# Supplementary material for: Platelet-to-lymphocyte ratio and neutrophil-to-lymphocyte ratio associated with disease activity in patients with Takayasu’s arteritis: a case-control study
Source: PubMed Central journal article supplement — BMJ Open. 2017 May 4;7(4):e014451. doi: 10.1136/bmjopen-2016-014451 (PMC5623399; doi:10.1136/bmjopen-2016-014451), 2017-05-04

# BMJ Open

## Platelet-to-Lymphocyte Ratio and Neutrophil-to-Lymphocyte Ratio Associated with Disease Activity in Patients with Takayasu's Arteritis

|                                 |                                                                                                        |
|---------------------------------|--------------------------------------------------------------------------------------------------------|
| Journal:                        | <i>BMJ Open</i>                                                                                        |
| Manuscript ID                   | bmjopen-2016-014451                                                                                    |
| Article Type:                   | Research                                                                                               |
| Date Submitted by the Author:   | 04-Nov-2016                                                                                            |
| Complete List of Authors:       | Pan, Lili; Beijing Anzhen Hospital, Capital Medical University,<br>Du, Juan<br>Li, Taotao<br>Liao, Hua |
| <b>Primary Subject Heading</b>: | Rheumatology                                                                                           |
| Secondary Subject Heading:      | Cardiovascular medicine                                                                                |
| Keywords:                       | Takayasu's arteritis, platelet-to-lymphocyte ratio, neutrophil-to-lymphocyte ratio                     |
|                                 |                                                                                                        |

SCHOLARONE™  
Manuscripts

## Platelet-to-Lymphocyte Ratio and Neutrophil-to-Lymphocyte Ratio Associated with Disease Activity in Patients with Takayasu's Arteritis

Lili Pan, Juan Du, Taotao Li, Hua Liao,

*Department of Rheumatology and Immunology, Beijing Anzhen Hospital, Capital Medical University, Beijing Institute of Heart, Lung, and Blood Vessel Diseases, Beijing, China, 100029.*

Correspondence to: Lili Pan, Department of Rheumatology and Immunology, Beijing Anzhen Hospital, Capital Medical University, Beijing, China.

E-mail: lilypanxmu@sina.com, Address: 2 Anzhen Road, Chaoyang District, Beijing, China.

Tel: 86-01-64456252

Running title: PLR and NLR are associated with TAK

### Abstract

**Background** Platelet-to-lymphocyte ratio (PLR) and Neutrophil-to-lymphocyte ratio (NLR) has been reported to reflect inflammatory response and disease activity in a variety of autoimmune diseases. **Objectives** This study aimed to evaluate the predictive value of PLR and NLR in disease activity in Takayasu's arteritis (TAK). **Methods** A retrospective study involving 88 TAK patients and 78 healthy controls was performed. We compared the PLR and NLR between patients and healthy controls, and also analyzed the correlations between PLR or NLR and indexes of TAK disease activity. **Results** Increased PLR and NLR were observed in TAK patients. PLR was positively correlated with hs-CRP ( $r=0.239$ ,  $P=0.010$ ) and ESR ( $r = 0.270$ ,  $P=0.010$ ), NLR also exhibited a positive relationship with Kerr's score ( $r=0.284$ ,  $P=0.002$ ), hs-CRP ( $r=0.313$ ,  $P=0.006$ ) and ESR ( $r=0.249$ ,  $P=0.019$ ). In addition, a PLR level of 183.39 was determined as predictive cut-off value of TAK (sensitivity 37.8%, specificity 93.0%, AUC=0.691); An NLR level of 2.417 was determined as predictive cut-off value of TAK (sensitivity 75.6%, specificity 55.8%, AUC=0.697). **Conclusions** PLR and NLR could be as useful marker to reflect inflammation and disease activity in TAK patients.

**Keywords** Takayasu's arteritis; platelet-to-lymphocyte ratio; neutrophil-to-lymphocyte ratio

### Strengths and limitations of this study

- This study is the first to assess the PLR and NLR could be as useful marker to reflect inflammation and disease activity in TAK patients.
- This study provides the accurate cutoff value of PLR and NLR to evaluated disease activity of TAK.
- This study provides a simple and convenient method for the clinical evaluation of TAK disease activity.
- This is a retrospective cross-sectional study, prospective cohort study to be further carried out in the future.

### Introduction

Takayasu's arteritis (TAK) is a systemic autoimmune large vessel vasculitis, mainly involving the aorta and its branches. TAK causes aortic injury such as stenosis, occlusion, hemangioma or dissection and other serious complications, which result in tissue and organ ischemia, dysfunction and even vascular rupture leading to sudden death in severe cases[1]. The pathology of TAK is characterized by inflammatory cell infiltration along with granulomatous inflammation as well as by excessive pro-inflammatory cytokines production[2]. Inflammatory markers such as erythrocyte sedimentation rate (ESR) and C-reactive protein (CRP) are commonly used to monitor disease progression. Although CRP and ESR are often useful to follow patients with TAK, some patients suffer from worsening of vasculitis without increasing CRP or ESR. These systemic inflammatory markers do not always show a positive correlation with inflammatory activity in the vessel wall[3].

Recent studies have shown that an abnormal NLR level is also associated with autoimmune disease, such as psoriasis[4], ulcerative colitis[5], rheumatoid arthritis (RA)[6], systemic lupus erythematosus (SLE), Sjögren's syndrome (pSS)[7] and Behçet's disease[8]. Likewise, platelets also play an active role in inflammation, and play regulatory roles in the immune system, and platelet-to-lymphocyte ratio (PLR) is also suggested as a potential marker to determine inflammation in recent years.

1  
2  
3 Similar to NLR, PLR is also used as an index for differential diagnosis or prognostic  
4 prediction of diverse diseases such as cancer[9], metabolic syndrome[10] and in-  
5 flammatory diseases, especially for evaluating the cardiovascular risk and events[11].  
6  
7 However, research about the association of PLR and NLR with TAK is limited. There-  
8 fore, in this retrospective study, we analyzed the medical records of 88 TAK patients  
9 and 78 healthy individuals, to evaluate the PLR or NLR in patients with TAK and com-  
10 pared it with controls. We aim to define the possible association of PLR and NLR with  
11 inflammatory response and disease activity in TAK. Furthermore, we also evaluated  
12 the relationship with PLR or NLR on TAK disease activity.  
13  
14  
15  
16  
17  
18  
19

## 20 **Methods**

### 21 **Patients**

22  
23  
24 A total of 88 patients with TAK were enrolled in this study according to the criteria  
25 for classification of TAK developed by American College of Rheumatology (ACR) in  
26 1990, all of the patients had glucocorticoid withdrawal for at least 6 months or were  
27 newly diagnosed without treatment. Patients who had chronic or current infections,  
28 tumors, hematologic diseases, other autoimmune diseases, lymphoproliferative dis-  
29 orders, hepatosplenic diseases or a history of allergic diseases were excluded. Dis-  
30 ease activity was assessed in TAK patients by using a modified version of Kerr's crite-  
31 ria. Kerr's criteria is used to define "active disease" if two of the following criteria are  
32 positive: (1) systemic features with no other cause; (2) elevated ESR; (3) indications  
33 of vascular ischemia or inflammation (e.g., claudication, diminished or absent pulses,  
34 bruit, vascular pain, asymmetric blood pressure); or (4) typical angiographic features  
35 (including any imaging method in addition to conventional angiography). All the pa-  
36 tients were recruited from the Department of Rheumatology and Immunology, Bei-  
37 jing Anzhen Hospital during the period of January 2013 to December 2015. 78 age-  
38 and sex-matched healthy donors were recruited from the Health Care Center of An-  
39 zhen Hospital. This study was approved by the Ethics Committee of Beijing Anzhen  
40 Hospital.  
41  
42  
43  
44  
45  
46  
47  
48  
49  
50  
51  
52  
53  
54

### 55 **Blood sample collection**

56 For each subject, 4 ml of venous blood was drawn in the morning after a 12-hour  
57  
58  
59  
60

1  
2  
3 fasting. The blood was then placed in a tube without anticoagulation, and the serum  
4 was collected after the blood was coagulated and centrifuged 3000 r/m for 5  
5 minutes. The total and differential leukocyte counts were determined by the Beck-  
6 man Coulter LH 780 (Beckman Coulter Ireland Inc., Mervue, Galway, Ireland). A Hitachi  
7 7600-120 automatic biochemical analyzer was used to test the serum parameters.  
8  
9

### 10 11 12 13 14 15 16 **Statistical analysis**

17 Values are expressed as means  $\pm$  standard error (means  $\pm$  SEM). Differences be-  
18 tween measured parameters in patients and controls were assessed by unpaired T  
19 test. If the data were not normally distributed, the Mann-Whitney test was applied;  
20 the assessment of qualitative parameters was performed by  $\chi^2$  test. Pearson's ap-  
21 proach was used to quantitate the correlation between variables. A receiver-  
22 operating characteristic (ROC) curve was constructed to determine the predictive  
23 value of PLR and NLR in patients group. A P value  $<0.05$  was considered statistically  
24 significant. All statistical studies were carried out with the SPSS program (version  
25 16.0, SPSS, Chicago, Illinois).  
26  
27  
28  
29  
30  
31  
32  
33  
34

### 35 **Results**

#### 36 **Basic characteristics of the study sample**

37 Clinical characteristics and laboratory findings of the 88 TAK patients and 78 healthy  
38 controls are given in Table 1. Patients with TAK had a median age of 39.35 years  
39 (range: 17-63), with a gender distribution of 78 women (88.63%) and 10 men  
40 (11.36%). In the control group, the median age was 36.46 years (range: 18-57) with a  
41 gender distribution of 68 women (87.18%) and 10 men (12.82%). There was no dif-  
42 ference in age or gender between the TAK and control groups. The total WBC count  
43 and neutrophil count were significantly higher in the patient group ( $p=0.000$ )  
44 ( $p=0.000$ ). PLR and NLR were markedly elevated in TAK patients than that of the con-  
45 trols ( $p=0.023$ ) ( $p=0.001$ ). ESR and serum hs-CRP levels were higher in the patient  
46 group than that in the controls ( $p=0.000$ ) ( $p=0.000$ ). No differences of other blood  
47 parameters such as lymphocyte (LY) count, PLT count, serum levels of alanine ami-  
48 notransferase (ALT), urea nitrogen (BUN) and creatinine (Cr) were observed between  
49  
50  
51  
52  
53  
54  
55  
56  
57  
58  
59  
60

1  
2  
3 the groups (Table 1).  
4  
5

### 6 **PLR and NLR were increased in TAK patients with disease activity**

7  
8 In our study the total WBC count, neutrophil count and platelet count were all in-  
9 creased in the active TAK group ( $p=0.001$ ) ( $p=0.001$ ) ( $p=0.004$ ). Serum immunoglobu-  
10 lin (Ig)A, IgG and complement 3 were significantly higher in the active TAK group  
11 than those in the inactive patients ( $p=0.007$ ) ( $p=0.011$ ) ( $p=0.000$ ). ESR and serum hs-  
12 CRP levels were higher in the active patients group than those in the inactive group  
13 ( $p=0.000$ ) ( $p=0.000$ ) (Table 2). As shown in figure 1, both PLR and NLR were signifi-  
14 cantly elevated in the active TAK patients compared to the inactive group ( $p=0.012$ )  
15 ( $p=0.010$ ).  
16  
17  
18  
19  
20  
21  
22  
23

### 24 **PLR and NLR had positive correlations to disease activity in TAK patients.**

25 As shown in Table3, PLR was positively correlated with hs-CRP ( $r =0.239$ ,  $P=0.010$ )  
26 and ESR ( $r = 0.270$ ,  $P=0.010$ ). NLR also exhibited a positive relationship with Kerr's  
27 score ( $r=0.284$ ,  $P=0.002$ ), hs-CRP ( $r=0.313$ ,  $P=0.006$ ) and ESR ( $r=0.249$ ,  $P=0.019$ ) (Fig-  
28 ure 3).  
29  
30  
31  
32  
33  
34

### 35 **Receiver-operating characteristic (ROC) curves of PLR and NLR for the TAK disease** 36 **activity (Kerr's score)**

37 We performed an ROC analysis to determine whether the best cutoff value of PLR  
38 and NLR predicts TAK disease activity (Kerr's score). For PLR, the area under the  
39 curve was 0.691 (95% confidence interval [CI] 0.580-0.802,  $P =0.002$ ), and the best  
40 cutoff value was 183.390, with sensitivity and specificity of 37.8% and 93.0%. For  
41 NLR, the area under the curve was 0.697 (95% confidence interval [CI] 0.588-0.806,  $P$   
42  $=0.001$ ), and the best cutoff value was 2.417, with sensitivity and specificity of 75.6%  
43 and 55.8% (Figure 2), respectively (Figure 3).  
44  
45  
46  
47  
48  
49  
50  
51

### 52 **Discussion**

53 Our present study analyzed the correlations of PLR and NLR with the disease activity  
54 in patients with TAK. The findings first showed that both PLR and NLR were increased  
55 in TAK, especially in the patients with disease activity. There were positive correla-  
56  
57  
58  
59  
60

1  
2  
3 tions in TAK patients between PLR and disease activity and between NLR and disease  
4 activity. Furthermore, our results suggest that PLR and NLR may be potential indica-  
5 tors of assessment of the disease activity in TAK.  
6  
7

8  
9  
10 Platelets play an active role in inflammation. In many studies of chronic inflammato-  
11 ry arthritis, evidence has been found for an increase in platelet activation[11, 12].  
12 Platelet inhibition was found to counterbalance the rises in IL-6 and the C-reactive  
13 protein in patients with acute cardiovascular diseases. Platelets extensively interact  
14 with leukocytes in vascular diseases such as atherosclerosis and are regarded as cen-  
15 tral players in the pathophysiology of vascular inflammation. Increased mass of cir-  
16 culating platelets is likely a consequence of chronic inflammation. Activated platelets  
17 not only produce growth factors such as platelet-derived growth factor (PDGF) and  
18 transforming growth factor- $\beta$  (TGF- $\beta$ ), but also release chemokines, which have im-  
19 portant effects in vascular inflammation, leading to thrombosis[13]. Similar to other  
20 inflammatory diseases, even in inactive TAK patients, atherosclerosis risk is also in-  
21 creased[14]. Study has suggested the scores of delayed contrast-enhanced magnetic  
22 resonance imaging were moderately correlated to CRP, platelet count and fibrinogen  
23 levels ( $p < 0.05$ ) [15]. There are some basic studies about use of antiplatelet agents in  
24 TAK [16, 17]. Antiplatelet treatment may also lower the frequency of ischaemic  
25 events in TA[18]. In the affected limb by arterial stenosis, more platelet aggregation  
26 and higher levels of thromboxane were reported in TAK patients, and these findings  
27 were shown to improve after 80mg/day aspirin treatment[14]. It is believed that en-  
28 dothelial injury and dysfunction caused by increased platelet activity and vascular  
29 inflammation are important factors for thrombosis development in TAK. A recent  
30 retrospective observational study suggested that antiplatelet therapy was associated  
31 with a lower frequency of ischemic events in patients with TAK[19]. Prednisone at a  
32 dosage of 1 mg/kg twice a day decreased the platelet count within 45 days of its ini-  
33 tiation. Takayasu's arteritis should be considered in the differential diagnosis of un-  
34 explained thrombocytosis, particularly in young women[20]. In our current study,  
35 there was no difference in PLT counts between TAK patients and controls, while the  
36 PLT counts of active patients were significantly higher than those of inactive pa-  
37 tients, and that correlated with disease activity indexes such as hs-CRP and ESR. ROC  
38  
39  
40  
41  
42  
43  
44  
45  
46  
47  
48  
49  
50  
51  
52  
53  
54  
55  
56  
57  
58  
59  
60

1  
2  
3 analysis has suggested that PLR predicts TAK disease activity (Kerr's score). Our re-  
4 sults indicated that the platelet is activated in TAK, and parallel to disease activity.  
5  
6

7  
8 Neutrophils, also essential mediators of host defense, can produce many inflam-  
9 matory mediators and cytokines and bridge the innate and adaptive immune re-  
10 sponses in autoimmune diseases[21]. Research evidence has demonstrated that  
11 neutrophils persist beyond acute inflammation to initiate and perpetuate chronic  
12 inflammation. Recent studies have indicated that changes in neutrophil are involved  
13 in the development of a variety of autoimmune diseases. There was a higher NLR in  
14 psoriasis vulgaris patients than the control group[4], and the abnormal NLR level was  
15 associated with RA[6], systemic lupus erythematosus (SLE), Sjögren's syndrome  
16 (pSS)[10] and Behçet's disease[8]. Another study investigated the neutrophil-platelet  
17 interaction in patients with granulomatosis with polyangiitis and suggested that  
18 platelet-neutrophil aggregates correlating positively with the disease activity  
19 score[22]. Pro-inflammatory cytokines IL-17, IL-8, IFN- $\gamma$  and TNF- $\alpha$  also play promi-  
20 nent roles in the recruitment, activation and survival of neutrophils at inflammatory  
21 sites[23], and expression of these cytokines was significantly increased in TAK [24]. In  
22 RA, anti-TNF- $\alpha$  therapies reduce IL-33 receptor expression on neutrophils and subse-  
23 quently decrease neutrophil migration and impaired chemotaxis of neutrophils may  
24 lead to a decrease in inflammation and disease severity in RA[25]. Our data showed  
25 that neutrophils in TAK patients were increased in the patient group, and positively  
26 correlated with disease activity. This is similar to previous results in other autoim-  
27 mune diseases. Similarly, our study found that both total WBC and neutrophil counts  
28 were significantly higher in TAK patients than those in the controls, and NLR was sig-  
29 nificantly higher in active patients. In order to clarify the correlations between NLR  
30 and TAK disease activity, we evaluated the level of the NLR and Kerr's score, hs-CRP  
31 and ESR in patients with TAK and found that NLR is positively correlated with TAK  
32 disease activity. All these findings suggest that PLR and NLR could be used to reflect  
33 inflammatory response and disease activity in TAK.  
34  
35  
36  
37  
38  
39  
40  
41  
42  
43  
44  
45  
46  
47  
48  
49  
50  
51  
52  
53  
54

55  
56 This study was a retrospective study of a sample of patients undergoing immuno-  
57 suppressive agents, which may influence of peripheral cell counts. A prospective co-  
58  
59  
60



hort study with larger numbers of TAK cases is desired to clarify the mechanism of PLR and NLN in TAK disease activity.

### Conclusion

In conclusion, the present study is the first to assess PLR and NLR in TAK patients and evaluates their relations with disease activity. We found a higher level of PLR and NPLR in the patient group compared with the control group and in patients with active disease compared with patients in remission. We evaluated their correlation with Kerr's Score, hs-CRP and ESR in the patient group. In light of results of our study, a high PLR or NLR may prove to be indicators of increased inflammatory response associated with the disease activity in TAK patients.

### Declaration of Conflicting Interests

The author(s) declared no potential conflicts of interest with respect to the research, authorship, and/or publication of this article.

### Funding

This project was supported by grants from the National Natural Science Foundation of China (81400361). The funders had no role in study design, data collection and analysis, decision to publish, or preparation.

### Contributorship Statement

LP conceived of the study, performed the statistical analysis and drafted the manuscript. JD, HL and TL participated in the design of the study, helped to revise the manuscript. All authors read and approved the final manuscript

### Data sharing statement

No additional data are available

### References

1. de Souza AW, de Carvalho JF: **Diagnostic and classification criteria of Takayasu arteritis.** *J Autoimmun* 2014, **48-49**:79-83.
2. Vaideeswar P, Deshpande JR: **Pathology of Takayasu arteritis: A brief review.** *Ann Pediatr Cardiol* 2013, **6**(1):52-58.
3. Dogan S, Piskin O, Solmaz D, Akar S, Gulcu A, Yuksel F, Cakir V, Sari I, Akkoc N, Onen F:

- 1  
2  
3 **Markers of endothelial damage and repair in Takayasu arteritis: are they associated with**  
4 **disease activity?** *Rheumatol Int* 2014, **34**(8):1129-1138.
- 5 4. Ereğ Toprak A, Ozlu E, Uzuncakmak TK, Yalcinkaya E, Sogut S, Karadag AS:  
6 **Neutrophil/Lymphocyte Ratio, Serum Endocan, and Nesfatin-1 Levels in Patients with**  
7 **Psoriasis Vulgaris Undergoing Phototherapy Treatment.** *Med Sci Monit* 2016, **22**:1232-1237.
- 8 5. Gao SQ, Huang LD, Dai RJ, Chen DD, Hu WJ, Shan YF: **Neutrophil-lymphocyte ratio: a**  
9 **controversial marker in predicting Crohn's disease severity.** *Int J Clin Exp Pathol* 2015,  
10 **8**(11):14779-14785.
- 11 6. Uslu AU, Kucuk A, Sahin A, Ugan Y, Yilmaz R, Gungor T, Bagcaci S, Kucuksen S: **Two new**  
12 **inflammatory markers associated with Disease Activity Score-28 in patients with**  
13 **rheumatoid arthritis: neutrophil-lymphocyte ratio and platelet-lymphocyte ratio.** *Int J*  
14 *Rheum Dis* 2015, **18**(7):731-735.
- 15 7. Hu ZD, Sun Y, Guo J, Huang YL, Qin BD, Gao Q, Qin Q, Deng AM, Zhong RQ: **Red blood cell**  
16 **distribution width and neutrophil/lymphocyte ratio are positively correlated with disease**  
17 **activity in primary Sjogren's syndrome.** *Clin Biochem* 2014, **47**(18):287-290.
- 18 8. Rifaioğlu EN, Bulbul Sen B, Ekiz O, Cigdem Dogramaci A: **Neutrophil to lymphocyte ratio in**  
19 **Behcet's disease as a marker of disease activity.** *Acta Dermatovenerol Alp Pannonica Adriat*  
20 2014, **23**(4):65-67.
- 21 9. Zhang F, Chen Z, Wang P, Hu X, Gao Y, He J: **Combination of platelet count and mean platelet**  
22 **volume (COP-MPV) predicts postoperative prognosis in both resectable early and advanced**  
23 **stage esophageal squamous cell cancer patients.** *Tumour Biol* 2016.
- 24 10. Akboga MK, Canpolat U, Yuksel M, Yayla C, Yilmaz S, Turak O, Ozeke O, Topaloglu S, Aras D:  
25 **Platelet to lymphocyte ratio as a novel indicator of inflammation is correlated with the**  
26 **severity of metabolic syndrome: A single center large-scale study.** *Platelets* 2016, **27**(2):178-  
27 183.
- 28 11. Akboga MK, Canpolat U, Yayla C, Ozcan F, Ozeke O, Topaloglu S, Aras D: **Association of**  
29 **Platelet to Lymphocyte Ratio With Inflammation and Severity of Coronary Atherosclerosis**  
30 **in Patients With Stable Coronary Artery Disease.** *Angiology* 2016, **67**(1):89-95.
- 31 12. Habets KL, Trouw LA, Levarht EW, Korporaal SJ, Habets PA, de Groot P, Huizinga TW, Toes RE:  
32 **Anti-citrullinated protein antibodies contribute to platelet activation in rheumatoid**  
33 **arthritis.** *Arthritis Res Ther* 2015, **17**:209.
- 34 13. Aksu K, Donmez A, Keser G: **Inflammation-induced thrombosis: mechanisms, disease**  
35 **associations and management.** *Curr Pharm Des* 2012, **18**(11):1478-1493.
- 36 14. Ueno M: **Antiplatelet therapy in the treatment of Takayasu arteritis.** *Circ J* 2010, **74**(6):1079-  
37 1080.
- 38 15. Jiang L, Li D, Yan F, Dai X, Li Y, Ma L: **Evaluation of Takayasu arteritis activity by delayed**  
39 **contrast-enhanced magnetic resonance imaging.** *Int J Cardiol* 2012, **155**(2):262-267.
- 40 16. Kasuya N, Kishi Y, Isobe M, Yoshida M, Numano F: **P-selectin expression, but not GPIIb/IIIa**  
41 **activation, is enhanced in the inflammatory stage of Takayasu's arteritis.** *Circ J* 2006,  
42 **70**(5):600-604.
- 43 17. Akazawa H, Ikeda U, Yamamoto K, Kuroda T, Shimada K: **Hypercoagulable state in patients**  
44 **with Takayasu's arteritis.** *Thromb Haemost* 1996, **75**(5):712-716.
- 45 18. Keser G, Direskeneli H, Aksu K: **Management of Takayasu arteritis: a systematic review.**  
46 *Rheumatology (Oxford)* 2014, **53**(5):793-801.
- 47 19. de Souza AW, Machado NP, Pereira VM, Arraes AE, Reis Neto ET, Mariz HA, Sato EI:  
48 **Antiplatelet therapy for the prevention of arterial ischemic events in takayasu arteritis.** *Circ*  
49 *J* 2010, **74**(6):1236-1241.
- 50 20. Peredo R, Vila S, Goni M, Colon E, Rios-Sola G: **Reactive thrombocytosis: an early**  
51 **manifestation of Takayasu arteritis.** *J Clin Rheumatol* 2005, **11**(5):270-273.
- 52 21. Kaplan MJ: **Role of neutrophils in systemic autoimmune diseases.** *Arthritis Res Ther* 2013,  
53 **15**(5):219.
- 54 22. Surmiak M, Hubalewska-Mazgaj M, Wawrzycka-Adamczyk K, Szczeklik W, Musial J, Brzozowski  
55 **T, Sanak M: Neutrophil-related and serum biomarkers in granulomatosis with polyangiitis**  
56 **support extracellular traps mechanism of the disease.** *Clin Exp Rheumatol* 2016, **34**(3 Suppl  
57 97):98-104.
- 58 23. Kolls JK, Linden A: **Interleukin-17 family members and inflammation.** *Immunity* 2004,  
59 **21**(4):467-476.
- 60

- 1  
2  
3  
4  
5  
6  
7  
8  
9  
10  
11  
12  
13  
14  
15  
16  
17  
18  
19  
20  
21  
22  
23  
24  
25  
26  
27  
28  
29  
30  
31  
32  
33  
34  
35  
36  
37  
38  
39  
40  
41  
42  
43  
44  
45  
46  
47  
48  
49  
50  
51  
52  
53  
54  
55  
56  
57  
58  
59  
60
24. Arnaud L, Haroche J, Mathian A, Gorochov G, Amoura Z: **Pathogenesis of Takayasu's arteritis: a 2011 update.** *Autoimmun Rev* 2011, **11**(1):61-67.
25. Verri WA, Jr., Souto FO, Vieira SM, Almeida SC, Fukada SY, Xu D, Alves-Filho JC, Cunha TM, Guerrero AT, Mattos-Guimaraes RB *et al*: **IL-33 induces neutrophil migration in rheumatoid arthritis and is a target of anti-TNF therapy.** *Ann Rheum Dis* 2010, **69**(9):1697-1703.

For peer review only

1  
2  
3  
4  
5  
6  
7  
8  
9  
10  
11  
12  
13  
14  
15  
16  
17  
18  
19  
20  
21  
22  
23  
24  
25  
26  
27  
28  
29  
30  
31  
32  
33  
34  
35  
36  
37  
38  
39  
40  
41  
42  
43  
44  
45  
46  
47  
48  
49  
50  
51  
52  
53  
54  
55  
56  
57  
58  
59  
60

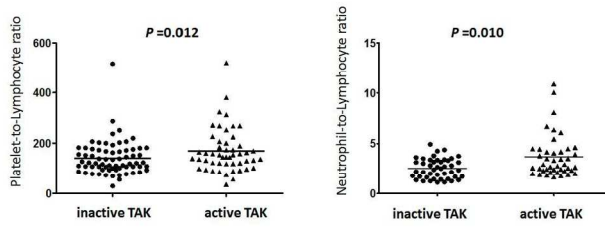

Figure 1. Comparison of Platelet-to-Lymphocyte ratio (PLR) and Neutrophil-to-Lymphocyte ratio (NLR) between inactive and active TAK patients.

#

297x210mm (155 x 155 DPI)

ew only

1  
2  
3  
4  
5  
6  
7  
8  
9  
10  
11  
12  
13  
14  
15  
16  
17  
18  
19  
20  
21  
22  
23  
24  
25  
26  
27  
28  
29  
30  
31  
32  
33  
34  
35  
36  
37  
38  
39  
40  
41  
42  
43  
44  
45  
46  
47  
48  
49  
50  
51  
52  
53  
54  
55  
56  
57  
58  
59  
60

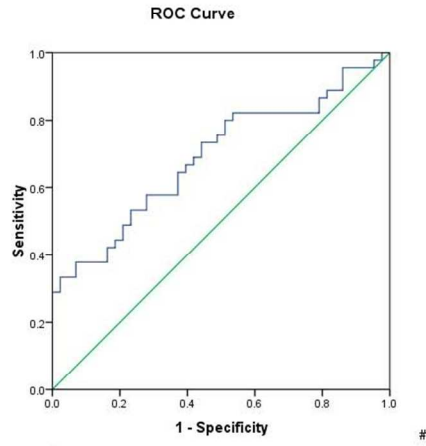

Figure 2. Receiver-operating characteristic curve for the platelet-to-lymphocyte ratio (PLR). The area under the curve was 0.691, with 37.8% sensitivity and 93.0% specificity.

210x297mm (104 x 104 DPI)

1  
2  
3  
4  
5  
6  
7  
8  
9  
10  
11  
12  
13  
14  
15  
16  
17  
18  
19  
20  
21  
22  
23  
24  
25  
26  
27  
28  
29  
30  
31  
32  
33  
34  
35  
36  
37  
38  
39  
40  
41  
42  
43  
44  
45  
46  
47  
48  
49  
50  
51  
52  
53  
54  
55  
56  
57  
58  
59  
60

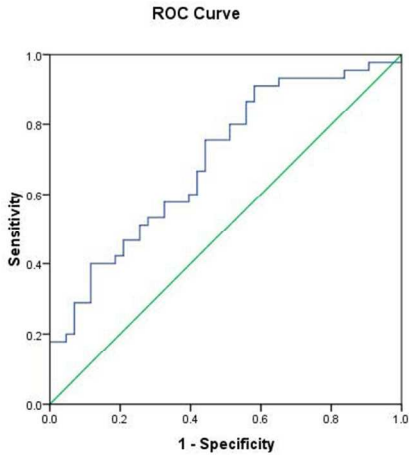

Figure 3. Receiver-operating characteristic curve for the neutrophil-to-lymphocyte Ratio (NLR). The area under the curve was 0.697, with sensitivity and specificity of 75.6% and 55.8%. #

210x297mm (100 x 100 DPI)

**Table1. Laboratory parameters of TAK patients and health controls**

| Parameter                | Control<br>(n=78) | TAK<br>(n=88)     | P-value |
|--------------------------|-------------------|-------------------|---------|
| Age (year)               | 36.46±7.23        | 39.35±15.03       | 0.235   |
| Gender (female/male)     | 68/10             | 78/10             | 0.774   |
| WBC (10 <sup>9</sup> /L) | 5.53±1.60         | 7.43±2.88         | 0.000   |
| LY (10 <sup>9</sup> /L)  | 1.72±0.46         | 1.81±0.73         | 0.342   |
| NE (10 <sup>9</sup> /L)  | 3.37±1.29         | 4.97±2.44         | 0.000   |
| PLT (10 <sup>9</sup> /L) | 247.21±45.49      | 241.82±79.69      | 0.387   |
| MPV ( fL)                | 10.21±0.98        | 10.37±0.97        | 0.269   |
| PDW %                    | 12.43±1.73        | 11.98±1.95        | 0.052   |
| ALT (U/L)                | 15.40±8.94        | 17.00±12.48       | 0.152   |
| BUN (mmol/L)             | 5.31±2.01         | 5.52±3.29         | 0.177   |
| Cr (μmol/L)              | 63.87±10.47       | 75.57±14.37       | 0.422   |
| ESR (mm/1hr)             | 4.39(2.00-12.00)  | 19.62(1.00-92.00) | 0.000   |
| hs-CRP(mg/L)             | 0.63(0.08-2.30)   | 9.50(0.08-38.62)  | 0.000   |
| NLR                      | 2.01±0.89         | 3.86±3.28         | 0.001   |
| PLR                      | 149.58±39.65      | 167.44±76.58      | 0.023   |

Abbreviations: n, number of patients; WBC, white blood cell; LY, lymphocyte; NE, neutrophil; PLT, platelet ;MPV, mean platelet volume; PDW, Platelet distribution width; ALT, alanine aminotransferase; BUN, urea nitrogen; Cr, creatinine; ESR, erythrocyte sedimentation rate; hs-CRP, high-sensitivity C-reactive protein; NRL, neutrophil-to-lymphocyte ratio; PLR, platelet-to-lymphocyte ratio.

Table 2. Comparison of the parameters in active and inactive TAK patients

| Parameter                | inactive TAK<br>(n=45) | Active TAK<br>(n=43) | P-value |
|--------------------------|------------------------|----------------------|---------|
| Age (year)               | 39.54±14.75            | 37.90±15.68          | 0.227   |
| Gender (female/male)     | 41/4                   | 37/6                 | 0.454   |
| Disease duration (month) | 15.59±6.86             | 13.94±7.43           | 0.853   |
| WBC( $10^9/L$ )          | 6.61±2.04              | 8.74±3.65            | 0.001   |
| LY( $10^9/L$ )           | 1.77±0.62              | 1.87±0.81            | 0.526   |
| NE ( $10^9/L$ )          | 4.33±1.81              | 5.86±2.34            | 0.001   |
| PLT( $10^9/L$ )          | 224.16±64.14           | 266.34±91.68         | 0.004   |
| ALT (U/L)                | 19.49±16.06            | 17.62±9.46           | 0.622   |
| BUN(mmol/L)              | 5.69±3.96              | 5.26±2.21            | 0.498   |
| Cr( $\mu\text{mol/L}$ )  | 71.10±21.12            | 81.60±14.75          | 0.563   |
| IgA (g/L)                | 1.82±0.95              | 2.57±1.30            | 0.007   |
| IgG (g/L)                | 9.50±2.27              | 11.58±4.57           | 0.011   |
| IgM (g/L)                | 1.33±0.76              | 1.38±0.85            | 0.812   |
| C3 (g/L)                 | 0.97±0.15              | 1.21±0.20            | 0.000   |
| C4 (g/L)                 | 0.59±0.29              | 0.71±0.32            | 0.079   |
| ESR (mm/1hr)             | 8.39(1.00-19.00)       | 33.81(4.00-92.00)    | 0.000   |
| hs-CRP(mg/L)             | 1.85(0.08-32.83)       | 20.04(0.49-38.62)    | 0.000   |

Abbreviations: n, number of patients; WBC, white blood cell; LY, lymphocyte; NE, neutrophil; PLT, platelet; ALT, alanine aminotransferase; BUN, urea nitrogen; Cr, creatinine; IgA, immunoglobulin A; IgG, immunoglobulin G; IgM, immunoglobulin M; C3, complement 3; C4, complement 4; ESR, erythrocyte sedimentation rate; hs-CRP, high-sensitivity C-reactive protein.



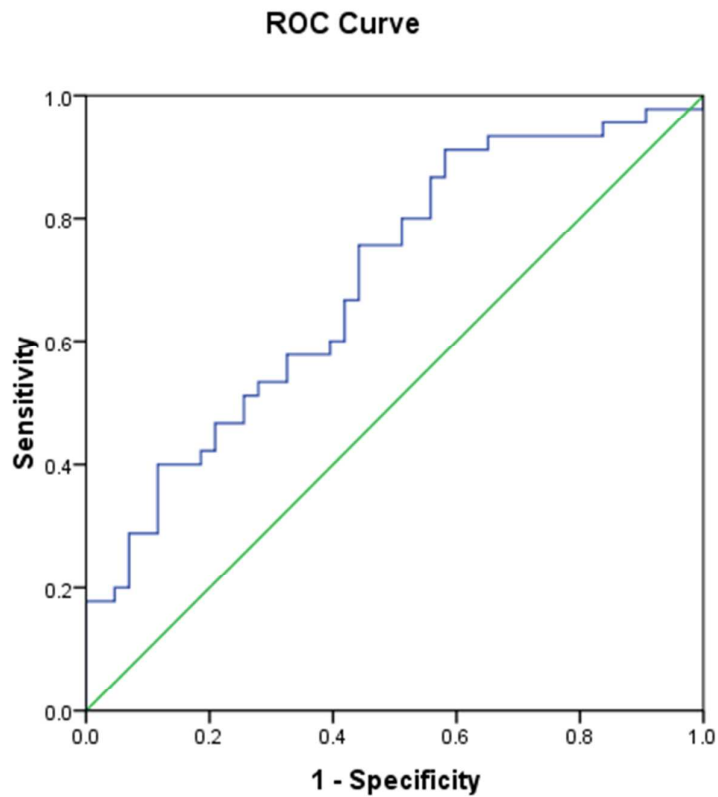

33  
34  
35  
36  
37  
38  
39  
40  
41  
42  
43  
44  
45  
46  
47  
48  
49  
50  
51  
52  
53  
54  
55  
56  
57  
58  
59  
60

**Figure 3. Receiver-operating characteristic curve for the neutrophil -to-lymphocyte Ratio (NLR).** The area under the curve was 0.697, with sensitivity and specificity of 75.6% and 55.8%.

| Section & Topic          | No  | Item                                                                                                                                                   | Reported on page # |
|--------------------------|-----|--------------------------------------------------------------------------------------------------------------------------------------------------------|--------------------|
| <b>TITLE OR ABSTRACT</b> |     | Platelet-to-Lymphocyte Ratio and Neutrophil-to-Lymphocyte Ratio were Associated to Disease Activity in Patients with Takayasu's Arteritis              |                    |
|                          | 1   | Identification as a study of diagnostic accuracy using at least one measure of accuracy (such as sensitivity, specificity, predictive values, or AUC)  | 1                  |
| <b>ABSTRACT</b>          |     |                                                                                                                                                        |                    |
|                          | 2   | Structured summary of study design, methods, results, and conclusions (for specific guidance, see STARD for Abstracts)                                 | 1                  |
| <b>INTRODUCTION</b>      |     |                                                                                                                                                        |                    |
|                          | 3   | Scientific and clinical background, including the intended use and clinical role of the index test                                                     | 2                  |
|                          | 4   | Study objectives and hypotheses                                                                                                                        | 3                  |
| <b>METHODS</b>           |     |                                                                                                                                                        |                    |
| <i>Study design</i>      | 5   | Whether data collection was planned before the index test and reference standard were performed (prospective study) or after (retrospective study)     | 3                  |
| <i>Participants</i>      | 6   | Eligibility criteria                                                                                                                                   | 3                  |
|                          | 7   | On what basis potentially eligible participants were identified (such as symptoms, results from previous tests, inclusion in registry)                 | 3                  |
|                          | 8   | Where and when potentially eligible participants were identified (setting, location and dates)                                                         | 3                  |
|                          | 9   | Whether participants formed a consecutive, random or convenience series                                                                                |                    |
| <i>Test methods</i>      | 10a | Index test, in sufficient detail to allow replication                                                                                                  | 4                  |
|                          | 10b | Reference standard, in sufficient detail to allow replication                                                                                          | 4                  |
|                          | 11  | Rationale for choosing the reference standard (if alternatives exist)                                                                                  | 4                  |
|                          | 12a | Definition of and rationale for test positivity cut-offs or result categories of the index test, distinguishing pre-specified from exploratory         | 4                  |
|                          | 12b | Definition of and rationale for test positivity cut-offs or result categories of the reference standard, distinguishing pre-specified from exploratory | 4                  |
|                          | 13a | Whether clinical information and reference standard results were available to the performers/readers of the index test                                 | 4                  |
|                          | 13b | Whether clinical information and index test results were available to the assessors of the reference standard                                          | 4                  |
| <i>Analysis</i>          | 14  | Methods for estimating or comparing measures of diagnostic accuracy                                                                                    | 4                  |
|                          | 15  | How indeterminate index test or reference standard results were handled                                                                                | 4                  |
|                          | 16  | How missing data on the index test and reference standard were handled                                                                                 | 4                  |
|                          | 17  | Any analyses of variability in diagnostic accuracy, distinguishing pre-specified from exploratory                                                      | 4                  |
|                          | 18  | Intended sample size and how it was determined                                                                                                         | 4                  |
| <b>RESULTS</b>           |     |                                                                                                                                                        |                    |
| <i>Participants</i>      | 19  | Flow of participants, using a diagram                                                                                                                  |                    |
|                          | 20  | Baseline demographic and clinical characteristics of participants                                                                                      | 4                  |
|                          | 21a | Distribution of severity of disease in those with the target condition                                                                                 |                    |
|                          | 21b | Distribution of alternative diagnoses in those without the target condition                                                                            |                    |
|                          | 22  | Time interval and any clinical interventions between index test and reference standard                                                                 |                    |
| <i>Test results</i>      | 23  | Cross tabulation of the index test results (or their distribution) by the results of the reference standard                                            | 5                  |
|                          | 24  | Estimates of diagnostic accuracy and their precision (such as 95% confidence intervals)                                                                | 5                  |
|                          | 25  | Any adverse events from performing the index test or the reference standard                                                                            | 5                  |
| <b>DISCUSSION</b>        |     |                                                                                                                                                        |                    |
|                          | 26  | Study limitations, including sources of potential bias, statistical uncertainty, and generalisability                                                  | 7                  |
|                          | 27  | Implications for practice, including the intended use and clinical role of the index test                                                              |                    |
| <b>OTHER INFORMATION</b> |     |                                                                                                                                                        |                    |
|                          | 28  | Registration number and name of registry                                                                                                               |                    |
|                          | 29  | Where the full study protocol can be accessed                                                                                                          |                    |
|                          | 30  | Sources of funding and other support; role of funders                                                                                                  | 8                  |

# STARD 2015

---

## AIM

STARD stands for “Standards for Reporting Diagnostic accuracy studies”. This list of items was developed to contribute to the completeness and transparency of reporting of diagnostic accuracy studies. Authors can use the list to write informative study reports. Editors and peer-reviewers can use it to evaluate whether the information has been included in manuscripts submitted for publication.

---

## EXPLANATION

A **diagnostic accuracy study** evaluates the ability of one or more medical tests to correctly classify study participants as having a **target condition**. This can be a disease, a disease stage, response or benefit from therapy, or an event or condition in the future. A medical test can be an imaging procedure, a laboratory test, elements from history and physical examination, a combination of these, or any other method for collecting information about the current health status of a patient.

The test whose accuracy is evaluated is called **index test**. A study can evaluate the accuracy of one or more index tests. Evaluating the ability of a medical test to correctly classify patients is typically done by comparing the distribution of the index test results with those of the **reference standard**. The reference standard is the best available method for establishing the presence or absence of the target condition. An accuracy study can rely on one or more reference standards.

If test results are categorized as either positive or negative, the cross tabulation of the index test results against those of the reference standard can be used to estimate the **sensitivity** of the index test (the proportion of participants *with* the target condition who have a positive index test), and its **specificity** (the proportion *without* the target condition who have a negative index test). From this cross tabulation (sometimes referred to as the contingency or “2x2” table), several other accuracy statistics can be estimated, such as the positive and negative **predictive values** of the test. Confidence intervals around estimates of accuracy can then be calculated to quantify the statistical **precision** of the measurements.

If the index test results can take more than two values, categorization of test results as positive or negative requires a **test positivity cut-off**. When multiple such cut-offs can be defined, authors can report a receiver operating characteristic (ROC) curve which graphically represents the combination of sensitivity and specificity for each possible test positivity cut-off. The **area under the ROC curve** informs in a single numerical value about the overall diagnostic accuracy of the index test.

The **intended use** of a medical test can be diagnosis, screening, staging, monitoring, surveillance, prediction or prognosis. The **clinical role** of a test explains its position relative to existing tests in the clinical pathway. A replacement test, for example, replaces an existing test. A triage test is used before an existing test; an add-on test is used after an existing test.

Besides diagnostic accuracy, several other outcomes and statistics may be relevant in the evaluation of medical tests. Medical tests can also be used to classify patients for purposes other than diagnosis, such as staging or prognosis. The STARD list was not explicitly developed for these other outcomes, statistics, and study types, although most STARD items would still apply.

---

## DEVELOPMENT

This STARD list was released in 2015. The 30 items were identified by an international expert group of methodologists, researchers, and editors. The guiding principle in the development of STARD was to select items that, when reported, would help readers to judge the potential for bias in the study, to appraise the applicability of the study findings and the validity of conclusions and recommendations. The list represents an update of the first version, which was published in 2003.

More information can be found on <http://www.equator-network.org/reporting-guidelines/stard>.

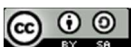

# BMJ Open

## Platelet-to-Lymphocyte Ratio and Neutrophil-to-Lymphocyte Ratio Associated with Disease Activity in Patients with Takayasu's Arteritis

|                                 |                                                                                                                                                                                                                                                                                                                                                                                           |
|---------------------------------|-------------------------------------------------------------------------------------------------------------------------------------------------------------------------------------------------------------------------------------------------------------------------------------------------------------------------------------------------------------------------------------------|
| Journal:                        | <i>BMJ Open</i>                                                                                                                                                                                                                                                                                                                                                                           |
| Manuscript ID                   | bmjopen-2016-014451.R1                                                                                                                                                                                                                                                                                                                                                                    |
| Article Type:                   | Research                                                                                                                                                                                                                                                                                                                                                                                  |
| Date Submitted by the Author:   | 14-Feb-2017                                                                                                                                                                                                                                                                                                                                                                               |
| Complete List of Authors:       | Pan, Lili; Beijing Anzhen Hospital, Capital Medical University, Rheumatology and Immunology<br>Du, Juan; Beijing Anzhen Hospital, Capital Medical University, Rheumatology and Immunology<br>Li, Taotao; Beijing Anzhen Hospital, Capital Medical University,, Rheumatology and Immunology<br>Liao, Hua; Beijing Anzhen Hospital, Capital Medical University, Rheumatology and Immunology |
| <b>Primary Subject Heading</b>: | Rheumatology                                                                                                                                                                                                                                                                                                                                                                              |
| Secondary Subject Heading:      | Cardiovascular medicine                                                                                                                                                                                                                                                                                                                                                                   |
| Keywords:                       | IMMUNOLOGY, Rheumatology < INTERNAL MEDICINE, Vascular medicine < INTERNAL MEDICINE                                                                                                                                                                                                                                                                                                       |
|                                 |                                                                                                                                                                                                                                                                                                                                                                                           |

SCHOLARONE™  
Manuscripts

Only

## Platelet-to-Lymphocyte Ratio and Neutrophil-to-Lymphocyte Ratio Associated with Disease Activity in Patients with Takayasu's Arteritis

Lili Pan, Juan Du, Taotao Li, Hua Liao,

*Department of Rheumatology and Immunology, Beijing Anzhen Hospital, Capital Medical University, Beijing Institute of Heart, Lung, and Blood Vessel Diseases, Beijing, China, 100029.*

Correspondence to: Lili Pan, Department of Rheumatology and Immunology, Beijing Anzhen Hospital, Capital Medical University, Beijing, China.

E-mail: lilypanxmu@sina.com, Address: 2 Anzhen Road, Chaoyang District, Beijing, China.

Tel:86-01-64456252

Running title: PLR and NLR are associated with TAK

### Abstract

**Background** Platelet-to-lymphocyte ratio (PLR) and Neutrophil-to-lymphocyte ratio (NLR) has been reported to reflect inflammatory response and disease activity in a variety of autoimmune diseases. **Objectives** This study aimed to evaluate the predictive value of PLR and NLR in disease activity in Takayasu's arteritis (TAK). **Methods** A retrospective study involving 88 TAK patients and 78 healthy controls was performed. We compared the PLR and NLR between patients and healthy controls, and also analyzed the correlations between PLR or NLR and indexes of TAK disease activity. **Results** Increased PLR and NLR were observed in TAK patients. PLR was positively correlated with hs-CRP ( $r=0.239$ ,  $P=0.010$ ) and ESR ( $r = 0.270$ ,  $P=0.010$ ), NLR also exhibited a positive relationship with Kerr's score ( $r=0.284$ ,  $P=0.002$ ), hs-CRP ( $r=0.313$ ,  $P=0.006$ ) and ESR ( $r=0.249$ ,  $P=0.019$ ). In addition, a PLR level of 183.39 was determined as predictive cut-off value of TAK (sensitivity 37.8%, specificity 93.0%, AUC=0.691); An NLR level of 2.417 was determined as predictive cut-off value of TAK (sensitivity 75.6%, specificity 55.8%, AUC=0.697). **Conclusions** PLR and NLR could be as useful marker to reflect inflammation and disease activity in TAK patients.

**Keywords** Takayasu's arteritis; platelet-to-lymphocyte ratio; neutrophil-to-lymphocyte ratio

### Strengths and limitations of this study

- This study is the first to assess the PLR and NLR could be as useful marker to reflect inflammation and disease activity in TAK patients.
- This study provides the accurate cutoff value of PLR and NLR to evaluated disease activity of TAK.
- This study provides a simple and convenient method for the clinical evaluation of TAK disease activity.
- This is a retrospective cross-sectional study, prospective cohort study to be further carried out in the future.

### Introduction

Takayasu's arteritis (TAK) is a systemic autoimmune large vessel vasculitis, mainly involving the aorta and its branches. TAK causes aortic injury such as stenosis, occlusion, hemangioma or dissection and other serious complications, which result in tissue and organ ischemia, dysfunction and even vascular rupture leading to sudden death in severe cases[1]. The pathology of TAK is characterized by inflammatory cell infiltration along with granulomatous inflammation as well as by excessive pro-inflammatory cytokines production[2]. Inflammatory markers such as erythrocyte sedimentation rate (ESR) and C-reactive protein (CRP) are commonly used to monitor disease progression. Although CRP and ESR are often useful to follow patients with TAK, some patients suffer from worsening of vasculitis without increasing CRP or ESR. These systemic inflammatory markers do not always show a positive correlation with inflammatory activity in the vessel wall[3].

Recent studies have shown that an abnormal NLR level is also associated with autoimmune disease, such as psoriasis[4], ulcerative colitis[5], rheumatoid arthritis (RA)[6], systemic lupus erythematosus (SLE) ,Sjögren's syndrome (pSS)[7] and Behçet's disease[8]. Likewise, platelets also play an active role in inflammation, and play regulatory roles in the immune system, and platelet-to-lymphocyte ratio (PLR) is also suggested as a potential marker to determine inflammation in recent years.

1  
2  
3 Similar to NLR, PLR is also used as an index for differential diagnosis or prognostic  
4 prediction of diverse diseases such as cancer[9], metabolic syndrome[10] and in-  
5 flammatory diseases, especially for evaluating the cardiovascular risk and events[11].  
6  
7 However, research about the association of PLR and NLR with TAK is limited. There-  
8 fore, in this retrospective study, we analyzed the medical records of 88 TAK patients  
9 and 78 healthy individuals, to evaluate the PLR or NLR in patients with TAK and com-  
10 pared it with controls. We aim to define the possible association of PLR and NLR with  
11 inflammatory response and disease activity in TAK. Furthermore, we also evaluated  
12 the relationship with PLR or NLR on TAK disease activity.  
13  
14  
15  
16  
17  
18  
19  
20

## 21 **Methods**

### 22 **Patients**

23  
24 A total of 88 patients with TAK were enrolled in this study according to the criteria  
25 for classification of TAK developed by American College of Rheumatology (ACR) in  
26 1990, all of the patients had glucocorticoid withdrawal for at least 6 months or were  
27 newly diagnosed without treatment. Patients who had chronic or current infections,  
28 tumors, hematologic diseases, other autoimmune diseases, lymphoproliferative dis-  
29 orders, hepatosplenic diseases or a history of allergic diseases were excluded. Dis-  
30 ease activity was assessed in TAK patients by using a modified version of Kerr's crite-  
31 ria. Kerr's criteria is used to define "active disease" if two of the following criteria are  
32 positive: (1) systemic features with no other cause; (2) elevated ESR; (3) indications  
33 of vascular ischemia or inflammation (e.g., claudication, diminished or absent pulses,  
34 bruit, vascular pain, asymmetric blood pressure); or (4) typical angiographic features  
35 (including any imaging method in addition to conventional angiography). All the pa-  
36 tients were recruited from the Department of Rheumatology and Immunology, Bei-  
37 jing Anzhen Hospital during the period of January 2013 to December 2015. 78 age-  
38 and sex-matched healthy donors were recruited from the Health Care Center of An-  
39 zhen Hospital. This study was approved by the Ethics Committee of Beijing Anzhen  
40 Hospital.  
41  
42  
43  
44  
45  
46  
47  
48  
49  
50  
51  
52  
53  
54  
55

### 56 **Blood sample collection**

57 For each subject, 4 ml of venous blood was drawn in the morning after a 12-hour  
58  
59  
60

1  
2  
3 fasting. The blood was then placed in a tube without anticoagulation, and the serum  
4 was collected after the blood was coagulated and centrifuged 3000 r/m for 5  
5 minutes. The total and differential leukocyte counts were determined by the Beck-  
6 man Coulter LH 780 (Beckman Coulter Ireland Inc., Mervue, Galway, Ireland). A Hitachi  
7 7600-120 automatic biochemical analyzer was used to test the serum parameters.  
8  
9  
10  
11  
12

### 13 14 15 **Statistical analysis**

16 Values are expressed as means  $\pm$  standard error (means  $\pm$  SEM). Differences between  
17 measured parameters in patients and controls were assessed by unpaired T  
18 test. If the data were not normally distributed, the Mann-Whitney test was applied;  
19 the assessment of qualitative parameters was performed by  $\chi^2$  test. Pearson's approach  
20 was used to quantitate the correlation between variables. A receiver-operating  
21 characteristic (ROC) curve was constructed to determine the predictive value of PLR  
22 and NLR in patients group. A P value  $<0.05$  was considered statistically significant.  
23 All statistical studies were carried out with the SPSS program (version 16.0, SPSS,  
24 Chicago, Illinois).  
25  
26  
27  
28  
29  
30  
31  
32  
33

### 34 35 **Results**

#### 36 **Basic characteristics of the study sample**

37 Clinical characteristics and laboratory findings of the 88 TAK patients and 78 healthy  
38 controls are given in Table 1. Patients with TAK had a median age of 39.35 years  
39 (range: 17-63), with a gender distribution of 78 women (88.63%) and 10 men  
40 (11.36%). In the control group, the median age was 36.46 years (range: 18-57) with a  
41 gender distribution of 68 women (87.18%) and 10 men (12.82%). There was no difference  
42 in age or gender between the TAK and control groups. The total WBC count and  
43 neutrophil count were significantly higher in the patient group ( $p=0.000$ ) ( $p=0.000$ ).  
44 PLR and NLR were markedly elevated in TAK patients than that of the controls  
45 ( $p=0.023$ ) ( $p=0.001$ ). ESR and serum hs-CRP levels were higher in the patient  
46 group than that in the controls ( $p=0.000$ ) ( $p=0.000$ ). No differences of other blood  
47 parameters such as lymphocyte (LY) count, PLT count, serum levels of alanine  
48 aminotransferase (ALT), urea nitrogen (BUN) and creatinine (Cr) were observed between  
49  
50  
51  
52  
53  
54  
55  
56  
57  
58  
59  
60



1  
2  
3 the groups (Table 1).  
4  
5

### 6 **PLR and NLR were increased in TAK patients with disease activity**

7  
8 In our study the total WBC count, neutrophil count and platelet count were all in-  
9 creased in the active TAK group ( $p=0.001$ ) ( $p=0.001$ ) ( $p=0.004$ ). Serum immunoglobu-  
10 lin (Ig)A, IgG and complement 3 were significantly higher in the active TAK group  
11 than those in the inactive patients ( $p=0.007$ ) ( $p=0.011$ ) ( $p=0.000$ ). ESR and serum hs-  
12 CRP levels were higher in the active patients group than those in the inactive group  
13 ( $p=0.000$ ) ( $p=0.000$ ) (Table 2). As shown in figure 1, both PLR and NLR were signifi-  
14 cantly elevated in the active TAK patients compared to the inactive group ( $p=0.012$ )  
15 ( $p=0.010$ ).  
16  
17  
18  
19  
20  
21  
22  
23

### 24 **PLR and NLR had positive correlations to disease activity in TAK patients.**

25 As shown in Table3, PLR was positively correlated with hs-CRP ( $r =0.239$ ,  $P=0.010$ )  
26 and ESR ( $r = 0.270$ ,  $P=0.010$ ). NLR also exhibited a positive relationship with Kerr's  
27 score ( $r=0.284$ ,  $P=0.002$ ), hs-CRP ( $r=0.313$ ,  $P=0.006$ ) and ESR ( $r=0.249$ ,  $P=0.019$ ) (Fig-  
28 ure 3).  
29  
30  
31  
32  
33

### 34 **Receiver-operating characteristic (ROC) curves of PLR and NLR for the TAK disease** 35 **activity (Kerr's score)**

36 We performed an ROC analysis to determine whether the best cutoff value of PLR  
37 and NLR predicts TAK disease activity (Kerr's score). For PLR, the area under the  
38 curve was 0.691 (95% confidence interval [CI] 0.580-0.802,  $P =0.002$ ), and the best  
39 cutoff value was 183.390, with sensitivity and specificity of 37.8% and 93.0%. For  
40 NLR, the area under the curve was 0.697 (95% confidence interval [CI] 0.588-0.806,  $P$   
41  $=0.001$ ), and the best cutoff value was 2.417, with sensitivity and specificity of 75.6%  
42 and 55.8% (Figure 2), respectively (Figure 3).  
43  
44  
45  
46  
47  
48  
49  
50  
51

### 52 **Discussion**

53 Our present study analyzed the correlations of PLR and NLR with the disease activity  
54 in patients with TAK. The findings first showed that both PLR and NLR were increased  
55 in TAK, especially in the patients with disease activity. There were positive correla-  
56  
57  
58  
59  
60

1  
2  
3 tions in TAK patients between PLR and disease activity and between NLR and disease  
4 activity. Furthermore, our results suggest that PLR and NLR may be potential indica-  
5 tors of assessment of the disease activity in TAK.  
6  
7

8  
9  
10 Platelets play an active role in inflammation. In many studies of chronic inflammato-  
11 ry arthritis, evidence has been found for an increase in platelet activation[11, 12].  
12 Platelet inhibition was found to counterbalance the rises in IL-6 and the C-reactive  
13 protein in patients with acute cardiovascular diseases. Platelets extensively interact  
14 with leukocytes in vascular diseases such as atherosclerosis and are regarded as cen-  
15 tral players in the pathophysiology of vascular inflammation. Increased mass of cir-  
16 culating platelets is likely a consequence of chronic inflammation. Activated platelets  
17 not only produce growth factors such as platelet-derived growth factor (PDGF) and  
18 transforming growth factor- $\beta$  (TGF- $\beta$ ), but also release chemokines, which have im-  
19 portant effects in vascular inflammation, leading to thrombosis[13]. Similar to other  
20 inflammatory diseases, even in inactive TAK patients, atherosclerosis risk is also in-  
21 creased[14]. Study has suggested the scores of delayed contrast-enhanced magnetic  
22 resonance imaging were moderately correlated to CRP, platelet count and fibrinogen  
23 levels ( $p < 0.05$ ) [15]. There are some basic studies about use of antiplatelet agents in  
24 TAK [16, 17]. Antiplatelet treatment may also lower the frequency of ischaemic  
25 events in TA[18]. In the affected limb by arterial stenosis, more platelet aggregation  
26 and higher levels of thromboxane were reported in TAK patients, and these findings  
27 were shown to improve after 80mg/day aspirin treatment[14]. It is believed that en-  
28 dothelial injury and dysfunction caused by increased platelet activity and vascular  
29 inflammation are important factors for thrombosis development in TAK. A recent  
30 retrospective observational study suggested that antiplatelet therapy was associated  
31 with a lower frequency of ischemic events in patients with TAK[19]. Prednisone at a  
32 dosage of 1 mg/kg twice a day decreased the platelet count within 45 days of its ini-  
33 tiation. Takayasu's arteritis should be considered in the differential diagnosis of un-  
34 explained thrombocytosis, particularly in young women[20]. In our current study,  
35 there was no difference in PLT counts between TAK patients and controls, while the  
36 PLT counts of active patients were significantly higher than those of inactive pa-  
37 tients, and that correlated with disease activity indexes such as hs-CRP and ESR. ROC  
38  
39  
40  
41  
42  
43  
44  
45  
46  
47  
48  
49  
50  
51  
52  
53  
54  
55  
56  
57  
58  
59  
60

1  
2  
3 analysis has suggested that PLR predicts TAK disease activity (Kerr's score). Our re-  
4 sults indicated that the platelet is activated in TAK, and parallel to disease activity.  
5  
6

7  
8 Neutrophils, also essential mediators of host defense, can produce many inflam-  
9 matory mediators and cytokines and bridge the innate and adaptive immune re-  
10 sponses in autoimmune diseases[21]. Research evidence has demonstrated that  
11 neutrophils persist beyond acute inflammation to initiate and perpetuate chronic  
12 inflammation. Recent studies have indicated that changes in neutrophil are involved  
13 in the development of a variety of autoimmune diseases. There was a higher NLR in  
14 psoriasis vulgaris patients than the control group[4], and the abnormal NLR level was  
15 associated with RA[6], systemic lupus erythematosus (SLE), Sjögren's syndrome  
16 (pSS)[10] and Behçet's disease[8]. Another study investigated the neutrophil-platelet  
17 interaction in patients with granulomatosis with polyangiitis and suggested that  
18 platelet-neutrophil aggregates correlating positively with the disease activity  
19 score[22]. Pro-inflammatory cytokines IL-17, IL-8, IFN- $\gamma$  and TNF- $\alpha$  also play promi-  
20 nent roles in the recruitment, activation and survival of neutrophils at inflammatory  
21 sites[23], and expression of these cytokines was significantly increased in TAK [24]. In  
22 RA, anti-TNF- $\alpha$  therapies reduce IL-33 receptor expression on neutrophils and subse-  
23 quently decrease neutrophil migration and impaired chemotaxis of neutrophils may  
24 lead to a decrease in inflammation and disease severity in RA[25]. Our data showed  
25 that neutrophils in TAK patients were increased in the patient group, and positively  
26 correlated with disease activity. This is similar to previous results in other autoim-  
27 mune diseases. Similarly, our study found that both total WBC and neutrophil counts  
28 were significantly higher in TAK patients than those in the controls, and NLR was sig-  
29 nificantly higher in active patients. In order to clarify the correlations between NLR  
30 and TAK disease activity, we evaluated the level of the NLR and Kerr's score, hs-CRP  
31 and ESR in patients with TAK and found that NLR is positively correlated with TAK  
32 disease activity. All these findings suggest that PLR and NLR could be used to reflect  
33 inflammatory response and disease activity in TAK.  
34  
35  
36  
37  
38  
39  
40  
41  
42  
43  
44  
45  
46  
47  
48  
49  
50  
51  
52  
53  
54  
55

56 This study was a retrospective study of a sample of patients undergoing immuno-  
57 suppressive agents, which may influence of peripheral cell counts. A prospective co-  
58  
59  
60

hort study with larger numbers of TAK cases is desired to clarify the mechanism of PLR and NLN in TAK disease activity.

### Conclusion

In conclusion, the present study is the first to assess PLR and NLR in TAK patients and evaluates their relations with disease activity. We found a higher level of PLR and NPLR in the patient group compared with the control group and in patients with active disease compared with patients in remission. We evaluated their correlation with Kerr's Score, hs-CRP and ESR in the patient group. In light of results of our study, a high PLR or NLR may prove to be indicators of increased inflammatory response associated with the disease activity in TAK patients.

### Declaration of Conflicting Interests

The author(s) declared no potential conflicts of interest with respect to the research, authorship, and/or publication of this article.

### Funding

This project was supported by grants from the National Natural Science Foundation of China (81400361). The funders had no role in study design, data collection and analysis, decision to publish, or preparation.

### Contributorship Statement

LP conceived of the study, performed the statistical analysis and drafted the manuscript. JD, HL and TL participated in the design of the study, helped to revise the manuscript. All authors read and approved the final manuscript

### Data sharing statement

No additional data are available

### References

1. de Souza AW, de Carvalho JF: **Diagnostic and classification criteria of Takayasu arteritis.** *J Autoimmun* 2014, **48-49**:79-83.
2. Vaideeswar P, Deshpande JR: **Pathology of Takayasu arteritis: A brief review.** *Ann Pediatr Cardiol* 2013, **6**(1):52-58.
3. Dogan S, Piskin O, Solmaz D, Akar S, Gulcu A, Yuksel F, Cakir V, Sari I, Akkoc N, Onen F:

- 1  
2  
3 **Markers of endothelial damage and repair in Takayasu arteritis: are they associated with**  
4 **disease activity?** *Rheumatol Int* 2014, **34**(8):1129-1138.
- 5 4. Ereğ Toprak A, Ozlu E, Uzuncakmak TK, Yalcinkaya E, Sogut S, Karadag AS:  
6 **Neutrophil/Lymphocyte Ratio, Serum Endocan, and Nesfatin-1 Levels in Patients with**  
7 **Psoriasis Vulgaris Undergoing Phototherapy Treatment.** *Med Sci Monit* 2016, **22**:1232-1237.
- 8 5. Gao SQ, Huang LD, Dai RJ, Chen DD, Hu WJ, Shan YF: **Neutrophil-lymphocyte ratio: a**  
9 **controversial marker in predicting Crohn's disease severity.** *Int J Clin Exp Pathol* 2015,  
10 **8**(11):14779-14785.
- 11 6. Uslu AU, Kucuk A, Sahin A, Ugan Y, Yilmaz R, Gungor T, Bagcaci S, Kucuksen S: **Two new**  
12 **inflammatory markers associated with Disease Activity Score-28 in patients with**  
13 **rheumatoid arthritis: neutrophil-lymphocyte ratio and platelet-lymphocyte ratio.** *Int J*  
14 *Rheum Dis* 2015, **18**(7):731-735.
- 15 7. Hu ZD, Sun Y, Guo J, Huang YL, Qin BD, Gao Q, Qin Q, Deng AM, Zhong RQ: **Red blood cell**  
16 **distribution width and neutrophil/lymphocyte ratio are positively correlated with disease**  
17 **activity in primary Sjogren's syndrome.** *Clin Biochem* 2014, **47**(18):287-290.
- 18 8. Rifaioğlu EN, Bulbul Sen B, Ekiz O, Cigdem Dogramaci A: **Neutrophil to lymphocyte ratio in**  
19 **Behcet's disease as a marker of disease activity.** *Acta Dermatovenerol Alp Pannonica Adriat*  
20 2014, **23**(4):65-67.
- 21 9. Zhang F, Chen Z, Wang P, Hu X, Gao Y, He J: **Combination of platelet count and mean platelet**  
22 **volume (COP-MPV) predicts postoperative prognosis in both resectable early and advanced**  
23 **stage esophageal squamous cell cancer patients.** *Tumour Biol* 2016.
- 24 10. Akboga MK, Canpolat U, Yuksel M, Yayla C, Yilmaz S, Turak O, Ozeke O, Topaloglu S, Aras D:  
25 **Platelet to lymphocyte ratio as a novel indicator of inflammation is correlated with the**  
26 **severity of metabolic syndrome: A single center large-scale study.** *Platelets* 2016, **27**(2):178-  
27 183.
- 28 11. Akboga MK, Canpolat U, Yayla C, Ozcan F, Ozeke O, Topaloglu S, Aras D: **Association of**  
29 **Platelet to Lymphocyte Ratio With Inflammation and Severity of Coronary Atherosclerosis**  
30 **in Patients With Stable Coronary Artery Disease.** *Angiology* 2016, **67**(1):89-95.
- 31 12. Habets KL, Trouw LA, Levarht EW, Korporaal SJ, Habets PA, de Groot P, Huizinga TW, Toes RE:  
32 **Anti-citrullinated protein antibodies contribute to platelet activation in rheumatoid**  
33 **arthritis.** *Arthritis Res Ther* 2015, **17**:209.
- 34 13. Aksu K, Donmez A, Keser G: **Inflammation-induced thrombosis: mechanisms, disease**  
35 **associations and management.** *Curr Pharm Des* 2012, **18**(11):1478-1493.
- 36 14. Ueno M: **Antiplatelet therapy in the treatment of Takayasu arteritis.** *Circ J* 2010, **74**(6):1079-  
37 1080.
- 38 15. Jiang L, Li D, Yan F, Dai X, Li Y, Ma L: **Evaluation of Takayasu arteritis activity by delayed**  
39 **contrast-enhanced magnetic resonance imaging.** *Int J Cardiol* 2012, **155**(2):262-267.
- 40 16. Kasuya N, Kishi Y, Isobe M, Yoshida M, Numano F: **P-selectin expression, but not GPIIb/IIIa**  
41 **activation, is enhanced in the inflammatory stage of Takayasu's arteritis.** *Circ J* 2006,  
42 **70**(5):600-604.
- 43 17. Akazawa H, Ikeda U, Yamamoto K, Kuroda T, Shimada K: **Hypercoagulable state in patients**  
44 **with Takayasu's arteritis.** *Thromb Haemost* 1996, **75**(5):712-716.
- 45 18. Keser G, Direskeneli H, Aksu K: **Management of Takayasu arteritis: a systematic review.**  
46 *Rheumatology (Oxford)* 2014, **53**(5):793-801.
- 47 19. de Souza AW, Machado NP, Pereira VM, Arraes AE, Reis Neto ET, Mariz HA, Sato EI:  
48 **Antiplatelet therapy for the prevention of arterial ischemic events in takayasu arteritis.** *Circ*  
49 *J* 2010, **74**(6):1236-1241.
- 50 20. Peredo R, Vila S, Goni M, Colon E, Rios-Sola G: **Reactive thrombocytosis: an early**  
51 **manifestation of Takayasu arteritis.** *J Clin Rheumatol* 2005, **11**(5):270-273.
- 52 21. Kaplan MJ: **Role of neutrophils in systemic autoimmune diseases.** *Arthritis Res Ther* 2013,  
53 **15**(5):219.
- 54 22. Surmiak M, Hubalewska-Mazgaj M, Wawrzycka-Adamczyk K, Szczeklik W, Musial J, Brzozowski  
55 **T, Sanak M: Neutrophil-related and serum biomarkers in granulomatosis with polyangiitis**  
56 **support extracellular traps mechanism of the disease.** *Clin Exp Rheumatol* 2016, **34**(3 Suppl  
57 97):98-104.
- 58 23. Kolls JK, Linden A: **Interleukin-17 family members and inflammation.** *Immunity* 2004,  
59 **21**(4):467-476.
- 60

- 1  
2  
3  
4  
5  
6  
7  
8  
9  
10  
11  
12  
13  
14  
15  
16  
17  
18  
19  
20  
21  
22  
23  
24  
25  
26  
27  
28  
29  
30  
31  
32  
33  
34  
35  
36  
37  
38  
39  
40  
41  
42  
43  
44  
45  
46  
47  
48  
49  
50  
51  
52  
53  
54  
55  
56  
57  
58  
59  
60
24. Arnaud L, Haroche J, Mathian A, Gorochov G, Amoura Z: **Pathogenesis of Takayasu's arteritis: a 2011 update.** *Autoimmun Rev* 2011, **11**(1):61-67.
25. Verri WA, Jr., Souto FO, Vieira SM, Almeida SC, Fukada SY, Xu D, Alves-Filho JC, Cunha TM, Guerrero AT, Mattos-Guimaraes RB *et al*: **IL-33 induces neutrophil migration in rheumatoid arthritis and is a target of anti-TNF therapy.** *Ann Rheum Dis* 2010, **69**(9):1697-1703.

For peer review only

**Table1. Laboratory parameters of TAK patients and health controls**

| Parameter                | Control<br>(n=78) | TAK<br>(n=88)     | P-value |
|--------------------------|-------------------|-------------------|---------|
| Age (year)               | 36.46±7.23        | 39.35±15.03       | 0.235   |
| Gender (female/male)     | 68/10             | 78/10             | 0.774   |
| WBC (10 <sup>9</sup> /L) | 5.53±1.60         | 7.43±2.88         | 0.000   |
| LY (10 <sup>9</sup> /L)  | 1.72±0.46         | 1.81±0.73         | 0.342   |
| NE (10 <sup>9</sup> /L)  | 3.37±1.29         | 4.97±2.44         | 0.000   |
| PLT (10 <sup>9</sup> /L) | 247.21±45.49      | 241.82±79.69      | 0.387   |
| MPV( fL)                 | 10.21±0.98        | 10.37±0.97        | 0.269   |
| PDW %                    | 12.43±1.73        | 11.98±1.95        | 0.052   |
| ALT (U/L)                | 15.40±8.94        | 17.00±12.48       | 0.152   |
| BUN (mmol/L)             | 5.31±2.01         | 5.52±3.29         | 0.177   |
| Cr (μmol/L)              | 63.87±10.47       | 75.57±14.37       | 0.422   |
| ESR (mm/1hr)             | 4.39(2.00-12.00)  | 19.62(1.00-92.00) | 0.000   |
| hs-CRP(mg/L)             | 0.63(0.08-2.30)   | 9.50(0.08-38.62)  | 0.000   |
| NLR                      | 2.01±0.89         | 3.86±3.28         | 0.001   |
| PLR                      | 149.58±39.65      | 167.44±76.58      | 0.023   |

Abbreviations: n, number of patients; WBC, white blood cell; LY, lymphocyte; NE, neutrophil; PLT, platelet ;MPV, mean platelet volume; PDW, Platelet distribution width; ALT, alanine aminotransferase; BUN, urea nitrogen; Cr, creatinine; ESR, erythrocyte sedimentation rate; hs-CRP, high-sensitivity C-reactive protein; NRL, neutrophil -to-lymphocyte ratio; PLR, platelet-to-lymphocyte ratio.

Table 2. Comparison of the parameters in active and inactive TAK patients

| Parameter                | inactive TAK<br>(n=45) | Active TAK<br>(n=43) | P-value |
|--------------------------|------------------------|----------------------|---------|
| Age (year)               | 39.54±14.75            | 37.90±15.68          | 0.227   |
| Gender (female/male)     | 41/4                   | 37/6                 | 0.454   |
| Disease duration (month) | 15.59±6.86             | 13.94±7.43           | 0.853   |
| WBC(10 <sup>9</sup> /L)  | 6.61±2.04              | 8.74±3.65            | 0.001   |
| LY(10 <sup>9</sup> /L)   | 1.77±0.62              | 1.87±0.81            | 0.526   |
| NE (10 <sup>9</sup> /L)  | 4.33±1.81              | 5.86±2.34            | 0.001   |
| PLT(10 <sup>9</sup> /L)  | 224.16±64.14           | 266.34±91.68         | 0.004   |
| ALT (U/L)                | 19.49±16.06            | 17.62±9.46           | 0.622   |
| BUN(mmol/L)              | 5.69±3.96              | 5.26±2.21            | 0.498   |
| Cr(μmol/L)               | 71.10±21.12            | 81.60±14.75          | 0.563   |
| IgA (g/L)                | 1.82±0.95              | 2.57±1.30            | 0.007   |
| IgG (g/L)                | 9.50±2.27              | 11.58±4.57           | 0.011   |
| IgM (g/L)                | 1.33±0.76              | 1.38±0.85            | 0.812   |
| C3 (g/L)                 | 0.97±0.15              | 1.21±0.20            | 0.000   |
| C4 (g/L)                 | 0.59±0.29              | 0.71±0.32            | 0.079   |
| ESR (mm/1hr)             | 8.39(1.00-19.00)       | 33.81(4.00-92.00)    | 0.000   |
| hs-CRP(mg/L)             | 1.85(0.08-32.83)       | 20.04(0.49-38.62)    | 0.000   |

Abbreviations: n, number of patients; WBC, white blood cell; LY, lymphocyte; NE, neutrophil; PLT, platelet; ALT, alanine aminotransferase; BUN, urea nitrogen; Cr, creatinine; IgA, immunoglobulin A; IgG, immunoglobulin G; IgM, immunoglobulin M; C3, complement 3; C4, complement 4; ESR, erythrocyte sedimentation rate; hs-CRP, high-sensitivity C-reactive protein.



**Table 3. Correlations of laboratory findings with disease activity in TAK Patients**

|     | Kerr's Score |                | hs-CRP   |                | ESR      |                |
|-----|--------------|----------------|----------|----------------|----------|----------------|
|     | <i>r</i>     | <i>p-value</i> | <i>r</i> | <i>p-value</i> | <i>r</i> | <i>p-value</i> |
| WBC | 0.336        | 0.000          | 0.458    | 0.000          | 0.388    | 0.000          |
| LY  | 0.054        | 0.602          | 0.119    | 0.205          | 0.276    | 0.023          |
| NE  | 0.311        | 0.001          | 0.466    | 0.000          | 0.327    | 0.356          |
| PLT | 0.353        | 0.000          | 0.345    | 0.000          | 0.490    | 0.000          |
| PLR | 0.185        | 0.052          | 0.239    | 0.010          | 0.270    | 0.010          |
| NLR | 0.284        | 0.002          | 0.313    | 0.006          | 0.249    | 0.019          |

Abbreviations: ESR, erythrocyte sedimentation rate; hs-CRP, high-sensitivity C - reactive protein; WBC, white blood cell; LY, lymphocyte; NE, neutrophil; PLT, platelet ; PLR, platelet-to-lymphocyte ratio; NRL, neutrophil -to-lymphocyte ratio;.

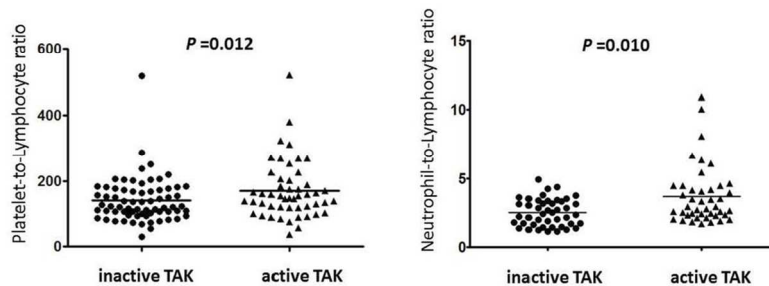

Figure 1. Comparison of Platelet-to-Lymphocyte ratio (PLR) and Neutrophil-to-Lymphocyte ratio (NLR) between inactive and active TAK patients.

105x74mm (300 x 300 DPI)

Review only

1  
2  
3  
4  
5  
6  
7  
8  
9  
10  
11  
12  
13  
14  
15  
16  
17  
18  
19  
20  
21  
22  
23  
24  
25  
26  
27  
28  
29  
30  
31  
32  
33  
34  
35  
36  
37  
38  
39  
40  
41  
42  
43  
44  
45  
46  
47  
48  
49  
50  
51  
52  
53  
54  
55  
56  
57  
58  
59  
60

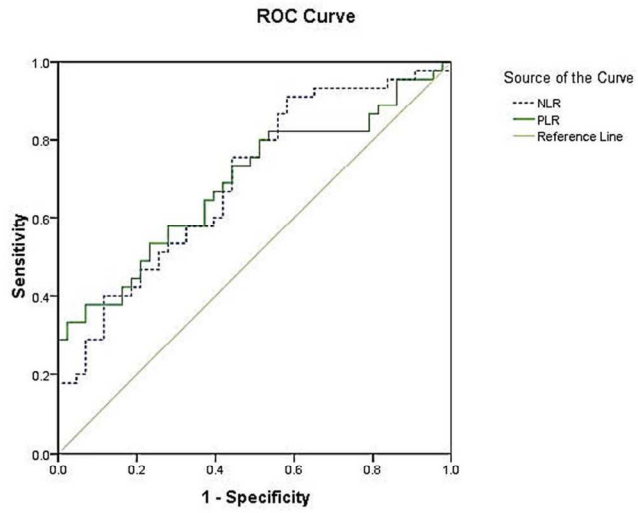

**Figure 2. Receiver-operating characteristic curves for the platelet-to-lymphocyte ratio (PLR) and neutrophil-to-lymphocyte Ratio (NLR). (Kerr: Criteria as the standard). For PLR, the area under the curve was 0.691, with 37.8% sensitivity and 93.0% specificity. for NLR, the area under the curve was 0.697, with sensitivity and specificity of 75.6% and 55.8%.**

110x155mm (300 x 300 DPI)

1  
2  
3  
4  
5  
6  
7  
8  
9  
10  
11  
12  
13  
14  
15  
16  
17  
18  
19  
20  
21  
22  
23  
24  
25  
26  
27  
28  
29  
30  
31  
32  
33  
34  
35  
36  
37  
38  
39  
40  
41  
42  
43  
44  
45  
46  
47  
48  
49  
50  
51  
52  
53  
54  
55  
56  
57  
58  
59  
60

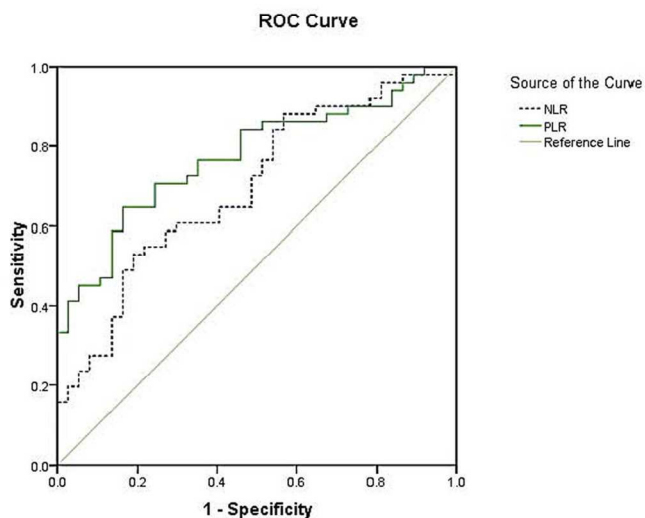

Figure 3. Receiver-operating characteristic curves for the platelet-to-lymphocyte ratio (PLR) and neutrophil-to-lymphocyte Ratio (NLR). (CRP as the standard). For PLR, the area under the curve was 0.775, with 64.7% sensitivity and 83.8% specificity, for NLR, the area under the curve was 0.698, with sensitivity and specificity of 52.9% and 81.1%.

108x154mm (300 x 300 DPI)

1  
2  
3  
4  
5  
6  
7  
8  
9  
10  
11  
12  
13  
14  
15  
16  
17  
18  
19  
20  
21  
22  
23  
24  
25  
26  
27  
28  
29  
30  
31  
32  
33  
34  
35  
36  
37  
38  
39  
40  
41  
42  
43  
44  
45  
46  
47  
48  
49  
50  
51  
52  
53  
54  
55  
56  
57  
58  
59  
60

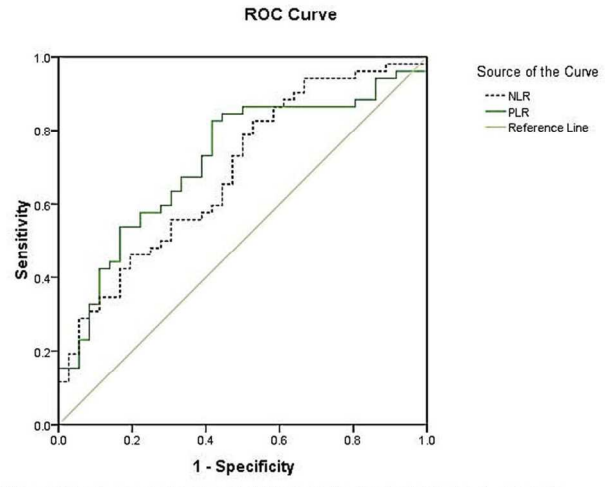

Figure 4. Receiver-operating characteristic curves for the platelet-to-lymphocyte ratio (PLR) and neutrophil-to-lymphocyte Ratio (NLR). (ESR as the standard). For PLR, the area under the curve was 0.718, with 53.8% sensitivity and 83.3% specificity, for NLR, the area under the curve was 0.688, with sensitivity and specificity of 82.7% and 47.2%.

117x166mm (300 x 300 DPI)

| Section & Topic          | No  | Item                                                                                                                                                   | Reported on page # |
|--------------------------|-----|--------------------------------------------------------------------------------------------------------------------------------------------------------|--------------------|
| <b>TITLE OR ABSTRACT</b> |     | Platelet-to-Lymphocyte Ratio and Neutrophil-to-Lymphocyte Ratio were Associated to Disease Activity in Patients with Takayasu's Arteritis              |                    |
|                          | 1   | Identification as a study of diagnostic accuracy using at least one measure of accuracy (such as sensitivity, specificity, predictive values, or AUC)  | 1                  |
| <b>ABSTRACT</b>          |     |                                                                                                                                                        |                    |
|                          | 2   | Structured summary of study design, methods, results, and conclusions (for specific guidance, see STARD for Abstracts)                                 | 1                  |
| <b>INTRODUCTION</b>      |     |                                                                                                                                                        |                    |
|                          | 3   | Scientific and clinical background, including the intended use and clinical role of the index test                                                     | 2                  |
|                          | 4   | Study objectives and hypotheses                                                                                                                        | 3                  |
| <b>METHODS</b>           |     |                                                                                                                                                        |                    |
| <i>Study design</i>      | 5   | Whether data collection was planned before the index test and reference standard were performed (prospective study) or after (retrospective study)     | 3                  |
| <i>Participants</i>      | 6   | Eligibility criteria                                                                                                                                   | 3                  |
|                          | 7   | On what basis potentially eligible participants were identified (such as symptoms, results from previous tests, inclusion in registry)                 | 3                  |
|                          | 8   | Where and when potentially eligible participants were identified (setting, location and dates)                                                         | 3                  |
|                          | 9   | Whether participants formed a consecutive, random or convenience series                                                                                |                    |
| <i>Test methods</i>      | 10a | Index test, in sufficient detail to allow replication                                                                                                  | 4                  |
|                          | 10b | Reference standard, in sufficient detail to allow replication                                                                                          | 4                  |
|                          | 11  | Rationale for choosing the reference standard (if alternatives exist)                                                                                  | 4                  |
|                          | 12a | Definition of and rationale for test positivity cut-offs or result categories of the index test, distinguishing pre-specified from exploratory         | 4                  |
|                          | 12b | Definition of and rationale for test positivity cut-offs or result categories of the reference standard, distinguishing pre-specified from exploratory | 4                  |
|                          | 13a | Whether clinical information and reference standard results were available to the performers/readers of the index test                                 | 4                  |
|                          | 13b | Whether clinical information and index test results were available to the assessors of the reference standard                                          | 4                  |
| <i>Analysis</i>          | 14  | Methods for estimating or comparing measures of diagnostic accuracy                                                                                    | 4                  |
|                          | 15  | How indeterminate index test or reference standard results were handled                                                                                | 4                  |
|                          | 16  | How missing data on the index test and reference standard were handled                                                                                 | 4                  |
|                          | 17  | Any analyses of variability in diagnostic accuracy, distinguishing pre-specified from exploratory                                                      | 4                  |
|                          | 18  | Intended sample size and how it was determined                                                                                                         | 4                  |
| <b>RESULTS</b>           |     |                                                                                                                                                        |                    |
| <i>Participants</i>      | 19  | Flow of participants, using a diagram                                                                                                                  |                    |
|                          | 20  | Baseline demographic and clinical characteristics of participants                                                                                      | 4                  |
|                          | 21a | Distribution of severity of disease in those with the target condition                                                                                 |                    |
|                          | 21b | Distribution of alternative diagnoses in those without the target condition                                                                            |                    |
|                          | 22  | Time interval and any clinical interventions between index test and reference standard                                                                 |                    |
| <i>Test results</i>      | 23  | Cross tabulation of the index test results (or their distribution) by the results of the reference standard                                            | 5                  |
|                          | 24  | Estimates of diagnostic accuracy and their precision (such as 95% confidence intervals)                                                                | 5                  |
|                          | 25  | Any adverse events from performing the index test or the reference standard                                                                            | 5                  |
| <b>DISCUSSION</b>        |     |                                                                                                                                                        |                    |
|                          | 26  | Study limitations, including sources of potential bias, statistical uncertainty, and generalisability                                                  | 7                  |
|                          | 27  | Implications for practice, including the intended use and clinical role of the index test                                                              |                    |
| <b>OTHER INFORMATION</b> |     |                                                                                                                                                        |                    |
|                          | 28  | Registration number and name of registry                                                                                                               |                    |
|                          | 29  | Where the full study protocol can be accessed                                                                                                          |                    |
|                          | 30  | Sources of funding and other support; role of funders                                                                                                  | 8                  |

# STARD 2015

---

## AIM

STARD stands for “Standards for Reporting Diagnostic accuracy studies”. This list of items was developed to contribute to the completeness and transparency of reporting of diagnostic accuracy studies. Authors can use the list to write informative study reports. Editors and peer-reviewers can use it to evaluate whether the information has been included in manuscripts submitted for publication.

---

## EXPLANATION

A **diagnostic accuracy study** evaluates the ability of one or more medical tests to correctly classify study participants as having a **target condition**. This can be a disease, a disease stage, response or benefit from therapy, or an event or condition in the future. A medical test can be an imaging procedure, a laboratory test, elements from history and physical examination, a combination of these, or any other method for collecting information about the current health status of a patient.

The test whose accuracy is evaluated is called **index test**. A study can evaluate the accuracy of one or more index tests. Evaluating the ability of a medical test to correctly classify patients is typically done by comparing the distribution of the index test results with those of the **reference standard**. The reference standard is the best available method for establishing the presence or absence of the target condition. An accuracy study can rely on one or more reference standards.

If test results are categorized as either positive or negative, the cross tabulation of the index test results against those of the reference standard can be used to estimate the **sensitivity** of the index test (the proportion of participants *with* the target condition who have a positive index test), and its **specificity** (the proportion *without* the target condition who have a negative index test). From this cross tabulation (sometimes referred to as the contingency or “2x2” table), several other accuracy statistics can be estimated, such as the positive and negative **predictive values** of the test. Confidence intervals around estimates of accuracy can then be calculated to quantify the statistical **precision** of the measurements.

If the index test results can take more than two values, categorization of test results as positive or negative requires a **test positivity cut-off**. When multiple such cut-offs can be defined, authors can report a receiver operating characteristic (ROC) curve which graphically represents the combination of sensitivity and specificity for each possible test positivity cut-off. The **area under the ROC curve** informs in a single numerical value about the overall diagnostic accuracy of the index test.

The **intended use** of a medical test can be diagnosis, screening, staging, monitoring, surveillance, prediction or prognosis. The **clinical role** of a test explains its position relative to existing tests in the clinical pathway. A replacement test, for example, replaces an existing test. A triage test is used before an existing test; an add-on test is used after an existing test.

Besides diagnostic accuracy, several other outcomes and statistics may be relevant in the evaluation of medical tests. Medical tests can also be used to classify patients for purposes other than diagnosis, such as staging or prognosis. The STARD list was not explicitly developed for these other outcomes, statistics, and study types, although most STARD items would still apply.

---

## DEVELOPMENT

This STARD list was released in 2015. The 30 items were identified by an international expert group of methodologists, researchers, and editors. The guiding principle in the development of STARD was to select items that, when reported, would help readers to judge the potential for bias in the study, to appraise the applicability of the study findings and the validity of conclusions and recommendations. The list represents an update of the first version, which was published in 2003.

More information can be found on <http://www.equator-network.org/reporting-guidelines/stard>.

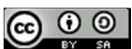

# BMJ Open

## Platelet-to-Lymphocyte Ratio and Neutrophil-to-Lymphocyte Ratio Associated with Disease Activity in Patients with Takayasu's Arteritis: A case-control study

|                                 |                                                                                                                                                                                                                                                                                                                                                                                           |
|---------------------------------|-------------------------------------------------------------------------------------------------------------------------------------------------------------------------------------------------------------------------------------------------------------------------------------------------------------------------------------------------------------------------------------------|
| Journal:                        | <i>BMJ Open</i>                                                                                                                                                                                                                                                                                                                                                                           |
| Manuscript ID                   | bmjopen-2016-014451.R2                                                                                                                                                                                                                                                                                                                                                                    |
| Article Type:                   | Research                                                                                                                                                                                                                                                                                                                                                                                  |
| Date Submitted by the Author:   | 15-Mar-2017                                                                                                                                                                                                                                                                                                                                                                               |
| Complete List of Authors:       | Pan, Lili; Beijing Anzhen Hospital, Capital Medical University, Rheumatology and Immunology<br>Du, Juan; Beijing Anzhen Hospital, Capital Medical University, Rheumatology and Immunology<br>Li, Taotao; Beijing Anzhen Hospital, Capital Medical University,, Rheumatology and Immunology<br>Liao, Hua; Beijing Anzhen Hospital, Capital Medical University, Rheumatology and Immunology |
| <b>Primary Subject Heading</b>: | Rheumatology                                                                                                                                                                                                                                                                                                                                                                              |
| Secondary Subject Heading:      | Cardiovascular medicine                                                                                                                                                                                                                                                                                                                                                                   |
| Keywords:                       | IMMUNOLOGY, Rheumatology < INTERNAL MEDICINE, Vascular medicine < INTERNAL MEDICINE                                                                                                                                                                                                                                                                                                       |
|                                 |                                                                                                                                                                                                                                                                                                                                                                                           |

SCHOLARONE™  
Manuscripts

Only



## Platelet-to-Lymphocyte Ratio and Neutrophil-to-Lymphocyte Ratio Associated with Disease Activity in Patients with Takayasu's Arteritis

Lili Pan, Juan Du, Taotao Li, Hua Liao,

*Department of Rheumatology and Immunology, Beijing Anzhen Hospital, Capital Medical University, Beijing Institute of Heart, Lung, and Blood Vessel Diseases, Beijing, China, 100029.*

Correspondence to: Lili Pan, Department of Rheumatology and Immunology, Beijing Anzhen Hospital, Capital Medical University, Beijing, China.

E-mail: lilypanxmu@sina.com, Address: 2 Anzhen Road, Chaoyang District, Beijing, China.

Tel: 86-01-64456252

Running title: PLR and NLR are associated with TAK

### Abstract

**Background** Platelet-to-lymphocyte ratio (PLR) and Neutrophil-to-lymphocyte ratio (NLR) has been reported to reflect inflammatory response and disease activity in a variety of autoimmune diseases. **Objectives** This study aimed to evaluate the predictive value of PLR and NLR in disease activity in Takayasu's arteritis (TAK). **Methods** A retrospective study involving 88 TAK patients and 78 healthy controls was performed. We compared the PLR and NLR between patients and healthy controls, and also analyzed the correlations between PLR or NLR and indexes of TAK disease activity. **Results** Increased PLR and NLR were observed in TAK patients. PLR was positively correlated with hs-CRP ( $r=0.239$ ,  $P=0.010$ ) and ESR ( $r = 0.270$ ,  $P=0.010$ ), NLR also exhibited a positive relationship with Kerr's score ( $r=0.284$ ,  $P=0.002$ ), hs-CRP ( $r=0.313$ ,  $P=0.006$ ) and ESR ( $r=0.249$ ,  $P=0.019$ ). In addition, a PLR level of 183.39 was determined as predictive cut-off value of TAK (sensitivity 37.8%, specificity 93.0%, AUC=0.691); An NLR level of 2.417 was determined as predictive cut-off value of TAK (sensitivity 75.6%, specificity 55.8%, AUC=0.697). **Conclusions** PLR and NLR could be as useful markers to reflect inflammation and disease activity in TAK patients.

**Keywords** Takayasu's arteritis; platelet-to-lymphocyte ratio; neutrophil-to-lymphocyte ratio

### Strengths and limitations of this study

- This study is the first to assess the PLR and NLR could be as useful marker to reflect inflammation and disease activity in TAK patients.
- This study provides the accurate cutoff value of PLR and NLR to evaluate disease activity of TAK.
- This study provides a simple and convenient method for the clinical evaluation of TAK disease activity.
- This is a retrospective cross-sectional study, prospective cohort study to be further carried out in the future.

### Introduction

Takayasu's arteritis (TAK) is a systemic autoimmune large vessel vasculitis, mainly involving the aorta and its branches. TAK causes aortic injury such as stenosis, occlusion, hemangioma or dissection and other serious complications, which result in tissue and organ ischemia, dysfunction and even vascular rupture leading to sudden death in severe cases[1]. The pathology of TAK is characterized by inflammatory cell infiltration along with granulomatous inflammation as well as by excessive pro-inflammatory cytokine production[2]. Inflammatory markers such as erythrocyte sedimentation rate (ESR) and C-reactive protein (CRP) are commonly used to monitor disease progression. Although CRP and ESR are often useful to follow patients with TAK, some patients suffer from worsening of vasculitis without increasing CRP or ESR. These systemic inflammatory markers do not always show a positive correlation with inflammatory activity in the vessel wall[3].

Recent studies have shown that an abnormal NLR level is also associated with autoimmune disease, such as psoriasis[4], ulcerative colitis[5], rheumatoid arthritis (RA)[6], systemic lupus erythematosus (SLE), Sjögren's syndrome (pSS)[7] and Behçet's disease[8]. Likewise, platelets also play an active role in inflammation, and play regulatory roles in the immune system, and platelet-to-lymphocyte ratio (PLR) is also suggested as a potential marker to determine inflammation in recent years.

1  
2  
3 Similar to NLR, PLR is also used as an index for differential diagnosis or prognostic  
4 prediction of diverse diseases such as cancer[9], metabolic syndrome[10] and in-  
5 flammatory diseases, especially for evaluating the cardiovascular risk and events[11].  
6  
7 However, research about the association of PLR and NLR with TAK is limited. There-  
8 fore, in this retrospective study, we analyzed the medical records of 88 TAK patients  
9 and 78 healthy individuals, to evaluate the PLR or NLR in patients with TAK and com-  
10 pared it with controls. We aim to define the possible association of PLR and NLR with  
11 inflammatory response and disease activity in TAK. Furthermore, we also evaluated  
12 the relationship with PLR or NLR on TAK disease activity.  
13  
14  
15  
16  
17  
18  
19  
20

## 21 **Methods**

### 22 **Patients**

23  
24 A total of 88 patients with TAK were enrolled in this study according to the criteria  
25 for classification of TAK developed by American College of Rheumatology (ACR) in  
26 1990, all of the patients had glucocorticoid withdrawal for at least 6 months or were  
27 newly diagnosed without treatment. Patients who had chronic or current infections,  
28 tumors, hematologic diseases, other autoimmune diseases, lymphoproliferative dis-  
29 orders, hepatosplenic diseases or a history of allergic diseases were excluded. Dis-  
30 ease activity was assessed in TAK patients by using a modified version of Kerr's crite-  
31 ria. Kerr's criteria is used to define "active disease" if two of the following criteria are  
32 positive: (1) systemic features with no other cause; (2) elevated ESR; (3) indications  
33 of vascular ischemia or inflammation (e.g., claudication, diminished or absent pulses,  
34 bruit, vascular pain, asymmetric blood pressure); or (4) typical angiographic features  
35 (including any imaging method in addition to conventional angiography). All the pa-  
36 tients were recruited from the Department of Rheumatology and Immunology, Bei-  
37 jing Anzhen Hospital during the period of January 2013 to December 2015. 78 age-  
38 and sex-matched healthy donors were recruited from the Health Care Center of An-  
39 zhen Hospital. This study was approved by the Ethics Committee of Beijing Anzhen  
40 Hospital.  
41  
42  
43  
44  
45  
46  
47  
48  
49  
50  
51  
52  
53  
54  
55

### 56 **Blood sample collection**

57 For each subject, 4 ml of venous blood was drawn in the morning after a 12-hour  
58  
59  
60

1  
2  
3 fasting. The blood was then placed in a tube without anticoagulation, and the serum  
4 was collected after the blood was coagulated and centrifuged 3000 r/m for 5  
5 minutes. The total and differential leukocyte counts were determined by the Beck-  
6 man Coulter LH 780 (Beckman Coulter Ireland Inc., Mervue, Galway, Ireland). A Hitachi  
7 7600-120 automatic biochemical analyzer was used to test the serum parameters.  
8  
9  
10  
11  
12

### 13 14 15 **Statistical analysis**

16 Values are expressed as means  $\pm$  standard error (means  $\pm$  SEM). Differences be-  
17 tween measured parameters in patients and controls were assessed by unpaired T  
18 test. If the data were not normally distributed, the Mann-Whitney test was applied;  
19 the assessment of qualitative parameters was performed by  $\chi^2$  test. Pearson's ap-  
20 proach was used to quantitate the correlation between variables. A receiver-  
21 operating characteristic (ROC) curve was constructed to determine the predictive  
22 value of PLR and NLR in patients group. A P value  $<0.05$  was considered statistically  
23 significant. All statistical studies were carried out with the SPSS program (version  
24 16.0, SPSS, Chicago, Illinois).  
25  
26  
27  
28  
29  
30  
31  
32  
33  
34

### 35 **Results**

#### 36 **Basic characteristics of the study sample**

37 Clinical characteristics and laboratory findings of the 88 TAK patients and 78 healthy  
38 controls are given in Table 1. Patients with TAK had a median age of 39.35 years  
39 (range: 17-63), with a gender distribution of 78 women (88.63%) and 10 men  
40 (11.36%). In the control group, the median age was 36.46 years (range: 18-57) with a  
41 gender distribution of 68 women (87.18%) and 10 men (12.82%). There was no dif-  
42 ference in age or gender between the TAK and control groups. The total WBC count  
43 and neutrophil count were significantly higher in the patient group ( $p=0.000$ )  
44 ( $p=0.000$ ). PLR and NLR were markedly elevated in TAK patients than that of the con-  
45 trols ( $p=0.023$ ) ( $p=0.001$ ). ESR and serum hs-CRP levels were higher in the patient  
46 group than that in the controls ( $p=0.000$ ) ( $p=0.000$ ). No differences of other blood  
47 parameters such as lymphocyte (LY) count, PLT count, serum levels of alanine ami-  
48 notransferase (ALT), urea nitrogen (BUN) and creatinine (Cr) were observed between  
49  
50  
51  
52  
53  
54  
55  
56  
57  
58  
59  
60

1  
2  
3 the groups (Table 1).  
4  
5

### 6 **PLR and NLR were increased in TAK patients with disease activity**

7  
8 In our study the total WBC count, neutrophil count and platelet count were all in-  
9 creased in the active TAK group ( $p=0.001$ ) ( $p=0.001$ ) ( $p=0.004$ ). Serum immunoglobu-  
10 lin (Ig)A, IgG and complement 3 were significantly higher in the active TAK group  
11 than those in the inactive patients ( $p=0.007$ ) ( $p=0.011$ ) ( $p=0.000$ ). ESR and serum hs-  
12 CRP levels were higher in the active patients group than those in the inactive group  
13 ( $p=0.000$ ) ( $p=0.000$ ) (Table 2). As shown in figure 1, both PLR and NLR were signifi-  
14 cantly elevated in the active TAK patients compared to the inactive group ( $p=0.012$ )  
15 ( $p=0.010$ ).  
16  
17  
18  
19  
20  
21  
22  
23

### 24 **PLR and NLR had positive correlations to disease activity in TAK patients.**

25 As shown in Table 3, PLR was positively correlated with hs-CRP ( $r = 0.239$ ,  $P=0.010$ )  
26 and ESR ( $r = 0.270$ ,  $P=0.010$ ). NLR also exhibited a positive relationship with Kerr's  
27 score ( $r=0.284$ ,  $P=0.002$ ), hs-CRP ( $r=0.313$ ,  $P=0.006$ ) and ESR ( $r=0.249$ ,  $P=0.019$ ) (Fig-  
28 ure 3).  
29  
30  
31  
32  
33

### 34 **Receiver-operating characteristic (ROC) curves of PLR and NLR for the TAK disease** 35 **activity (Kerr's score)**

36 We performed an ROC analysis to determine whether the best cutoff value of PLR  
37 and NLR predicts TAK disease activity (Kerr's score). For PLR, the area under the  
38 curve was 0.691 (95% confidence interval [CI] 0.580-0.802,  $P = 0.002$ ), and the best  
39 cutoff value was 183.390, with sensitivity and specificity of 37.8% and 93.0%. For  
40 NLR, the area under the curve was 0.697 (95% confidence interval [CI] 0.588-0.806,  $P$   
41  $=0.001$ ), and the best cutoff value was 2.417, with sensitivity and specificity of 75.6%  
42 and 55.8% (Figure 2), respectively (Figure 3).  
43  
44  
45  
46  
47  
48  
49  
50  
51

### 52 **Discussion**

53 Our present study analyzed the correlations of PLR and NLR with the disease activity  
54 in patients with TAK. The findings first showed that both PLR and NLR were increased  
55 in TAK, especially in the patients with disease activity. There were positive correla-  
56  
57  
58  
59  
60

1  
2  
3 tions in TAK patients between PLR and disease activity and between NLR and disease  
4 activity. Furthermore, our results suggest that PLR and NLR may be potential indica-  
5 tors of assessment of the disease activity in TAK.  
6  
7

8  
9  
10 Platelets play an active role in inflammation. In many studies of chronic inflammatory  
11 arthritis, evidence has been found for an increase in platelet activation[11, 12].  
12 Platelet inhibition was found to counterbalance the rises in IL-6 and the C-reactive  
13 protein in patients with acute cardiovascular diseases. Platelets extensively interact  
14 with leukocytes in vascular diseases such as atherosclerosis and are regarded as cen-  
15 tral players in the pathophysiology of vascular inflammation. Increased mass of cir-  
16 culating platelets is likely a consequence of chronic inflammation. Activated platelets  
17 not only produce growth factors such as platelet-derived growth factor (PDGF) and  
18 transforming growth factor- $\beta$  (TGF- $\beta$ ), but also release chemokines, which have im-  
19 portant effects in vascular inflammation, leading to thrombosis[13]. Similar to other  
20 inflammatory diseases, even in inactive TAK patients, atherosclerosis risk is also in-  
21 creased[14]. Study has suggested the scores of delayed contrast-enhanced magnetic  
22 resonance imaging were moderately correlated to CRP, platelet count and fibrinogen  
23 levels ( $p < 0.05$ ) [15]. There are some basic studies about use of antiplatelet agents in  
24 TAK [16, 17]. Antiplatelet treatment may also lower the frequency of ischaemic  
25 events in TA[18]. In the affected limb by arterial stenosis, more platelet aggregation  
26 and higher levels of thromboxane were reported in TAK patients, and these findings  
27 were shown to improve after 80mg/day aspirin treatment[14]. It is believed that en-  
28 dothelial injury and dysfunction caused by increased platelet activity and vascular  
29 inflammation are important factors for thrombosis development in TAK. A recent  
30 retrospective observational study suggested that antiplatelet therapy was associated  
31 with a lower frequency of ischemic events in patients with TAK[19]. Prednisone at a  
32 dosage of 1 mg/kg twice a day decreased the platelet count within 45 days of its ini-  
33 tiation. Takayasu's arteritis should be considered in the differential diagnosis of un-  
34 explained thrombocytosis, particularly in young women[20]. In our current study,  
35 there was no difference in PLT counts between TAK patients and controls, while the  
36 PLT counts of active patients were significantly higher than those of inactive pa-  
37 tients, and that correlated with disease activity indexes such as hs-CRP and ESR. ROC  
38  
39  
40  
41  
42  
43  
44  
45  
46  
47  
48  
49  
50  
51  
52  
53  
54  
55  
56  
57  
58  
59  
60

1  
2  
3 analysis has suggested that PLR predicts TAK disease activity (Kerr's score). Our results  
4 indicated that the platelet is activated in TAK, and parallel to disease activity.  
5  
6

7  
8 Neutrophils, also essential mediators of host defense, can produce many inflam-  
9 matory mediators and cytokines and bridge the innate and adaptive immune re-  
10 sponses in autoimmune diseases[21]. Research evidence has demonstrated that  
11 neutrophils persist beyond acute inflammation to initiate and perpetuate chronic  
12 inflammation. Recent studies have indicated that changes in neutrophil are involved  
13 in the development of a variety of autoimmune diseases. There was a higher NLR in  
14 psoriasis vulgaris patients than the control group[4], and the abnormal NLR level was  
15 associated with RA[6], systemic lupus erythematosus (SLE), Sjögren's syndrome  
16 (pSS)[10] and Behçet's disease[8]. Another study investigated the neutrophil-platelet  
17 interaction in patients with granulomatosis with polyangiitis and suggested that  
18 platelet-neutrophil aggregates correlating positively with the disease activity  
19 score[22]. Pro-inflammatory cytokines IL-17, IL-8, IFN- $\gamma$  and TNF- $\alpha$  also play promi-  
20 nent roles in the recruitment, activation and survival of neutrophils at inflammatory  
21 sites[23], and expression of these cytokines was significantly increased in TAK [24]. In  
22 RA, anti-TNF- $\alpha$  therapies reduce IL-33 receptor expression on neutrophils and subse-  
23 quently decrease neutrophil migration and impaired chemotaxis of neutrophils may  
24 lead to a decrease in inflammation and disease severity in RA[25]. Our data showed  
25 that neutrophils in TAK patients were increased in the patient group, and positively  
26 correlated with disease activity. This is similar to previous results in other autoim-  
27 mune diseases. Similarly, our study found that both total WBC and neutrophil counts  
28 were significantly higher in TAK patients than those in the controls, and NLR was sig-  
29 nificantly higher in active patients. In order to clarify the correlations between NLR  
30 and TAK disease activity, we evaluated the level of the NLR and Kerr's score, hs-CRP  
31 and ESR in patients with TAK and found that NLR is positively correlated with TAK  
32 disease activity. All these findings suggest that PLR and NLR could be used to reflect  
33 inflammatory response and disease activity in TAK.  
34  
35  
36  
37  
38  
39  
40  
41  
42  
43  
44  
45  
46  
47  
48  
49  
50  
51  
52  
53  
54

55  
56 This study was a retrospective study of a sample of patients undergoing immunosup-  
57 pressive agents, which may influence of peripheral cell counts. A prospective cohort  
58  
59  
60

1  
2  
3 study with larger numbers of TAK cases is desired to clarify the mechanism of PLR  
4 and NLN in TAK disease activity.  
5  
6  
7

### 8 **Conclusion**

9  
10 In conclusion, the present study is the first to assess PLR and NLR in TAK patients and  
11 evaluates their relations with disease activity. We found a higher level of PLR and  
12 NPLR in the patient group compared with the control group and in patients with ac-  
13 tive disease compared with patients in remission. We evaluated their correlation  
14 with Kerr's Score, hs-CRP and ESR in the patient group. In light of results of our  
15 study, a high PLR or NLR may prove to be indicators of increased inflammatory re-  
16 sponse associated with the disease activity in TAK patients.  
17  
18  
19  
20  
21  
22

### 23 **Declaration of Conflicting Interests**

24  
25 The author(s) declared no potential conflicts of interest with respect to the research,  
26 authorship, and/or publication of this article.  
27  
28  
29

### 30 **Funding**

31  
32 This project was supported by grants from the National Natural Science Foundation  
33 of China (81400361). The funders had no role in study design, data collection and  
34 analysis, decision to publish, or preparation.  
35  
36  
37  
38  
39

### 40 **Contributorship Statement**

41 LP conceived of the study, performed the statistical analysis and drafted the manu-  
42 script. JD, HL and TL participated in the design of the study, helped to revise the  
43 manuscript. All authors read and approved the final manuscript  
44  
45  
46

### 47 **Data sharing statement**

48 No additional data are available  
49  
50  
51  
52

### 53 **References**

- 54 1. de Souza AW, de Carvalho JF: **Diagnostic and classification criteria of Takayasu arteritis.** *J*  
55 *Autoimmun* 2014, **48-49**:79-83.
- 56 2. Vaideeswar P, Deshpande JR: **Pathology of Takayasu arteritis: A brief review.** *Ann Pediatr*  
57 *Cardiol* 2013, **6**(1):52-58.
- 58 3. Dogan S, Piskin O, Solmaz D, Akar S, Gulcu A, Yuksel F, Cakir V, Sari I, Akkoc N, Onen F:  
59  
60



- 1  
2  
3 **Markers of endothelial damage and repair in Takayasu arteritis: are they associated with**  
4 **disease activity?** *Rheumatol Int* 2014, **34**(8):1129-1138.
- 5 4. Ereğ Toprak A, Ozlu E, Uzuncakmak TK, Yalcinkaya E, Sogut S, Karadag AS:  
6 **Neutrophil/Lymphocyte Ratio, Serum Endocan, and Nesfatin-1 Levels in Patients with**  
7 **Psoriasis Vulgaris Undergoing Phototherapy Treatment.** *Med Sci Monit* 2016, **22**:1232-1237.
- 8 5. Gao SQ, Huang LD, Dai RJ, Chen DD, Hu WJ, Shan YF: **Neutrophil-lymphocyte ratio: a**  
9 **controversial marker in predicting Crohn's disease severity.** *Int J Clin Exp Pathol* 2015,  
10 **8**(11):14779-14785.
- 11 6. Uslu AU, Kucuk A, Sahin A, Ugan Y, Yilmaz R, Gungor T, Bagcaci S, Kucuksen S: **Two new**  
12 **inflammatory markers associated with Disease Activity Score-28 in patients with**  
13 **rheumatoid arthritis: neutrophil-lymphocyte ratio and platelet-lymphocyte ratio.** *Int J*  
14 *Rheum Dis* 2015, **18**(7):731-735.
- 15 7. Hu ZD, Sun Y, Guo J, Huang YL, Qin BD, Gao Q, Qin Q, Deng AM, Zhong RQ: **Red blood cell**  
16 **distribution width and neutrophil/lymphocyte ratio are positively correlated with disease**  
17 **activity in primary Sjogren's syndrome.** *Clin Biochem* 2014, **47**(18):287-290.
- 18 8. Rifaioğlu EN, Bulbul Sen B, Ekiz O, Cigdem Dogramaci A: **Neutrophil to lymphocyte ratio in**  
19 **Behcet's disease as a marker of disease activity.** *Acta Dermatovenerol Alp Pannonica Adriat*  
20 2014, **23**(4):65-67.
- 21 9. Zhang F, Chen Z, Wang P, Hu X, Gao Y, He J: **Combination of platelet count and mean platelet**  
22 **volume (COP-MPV) predicts postoperative prognosis in both resectable early and advanced**  
23 **stage esophageal squamous cell cancer patients.** *Tumour Biol* 2016.
- 24 10. Akboga MK, Canpolat U, Yuksel M, Yayla C, Yilmaz S, Turak O, Ozeke O, Topaloglu S, Aras D:  
25 **Platelet to lymphocyte ratio as a novel indicator of inflammation is correlated with the**  
26 **severity of metabolic syndrome: A single center large-scale study.** *Platelets* 2016, **27**(2):178-  
27 183.
- 28 11. Akboga MK, Canpolat U, Yayla C, Ozcan F, Ozeke O, Topaloglu S, Aras D: **Association of**  
29 **Platelet to Lymphocyte Ratio With Inflammation and Severity of Coronary Atherosclerosis**  
30 **in Patients With Stable Coronary Artery Disease.** *Angiology* 2016, **67**(1):89-95.
- 31 12. Habets KL, Trouw LA, Levarht EW, Korporaal SJ, Habets PA, de Groot P, Huizinga TW, Toes RE:  
32 **Anti-citrullinated protein antibodies contribute to platelet activation in rheumatoid**  
33 **arthritis.** *Arthritis Res Ther* 2015, **17**:209.
- 34 13. Aksu K, Donmez A, Keser G: **Inflammation-induced thrombosis: mechanisms, disease**  
35 **associations and management.** *Curr Pharm Des* 2012, **18**(11):1478-1493.
- 36 14. Ueno M: **Antiplatelet therapy in the treatment of Takayasu arteritis.** *Circ J* 2010, **74**(6):1079-  
37 1080.
- 38 15. Jiang L, Li D, Yan F, Dai X, Li Y, Ma L: **Evaluation of Takayasu arteritis activity by delayed**  
39 **contrast-enhanced magnetic resonance imaging.** *Int J Cardiol* 2012, **155**(2):262-267.
- 40 16. Kasuya N, Kishi Y, Isobe M, Yoshida M, Numano F: **P-selectin expression, but not GPIIb/IIIa**  
41 **activation, is enhanced in the inflammatory stage of Takayasu's arteritis.** *Circ J* 2006,  
42 **70**(5):600-604.
- 43 17. Akazawa H, Ikeda U, Yamamoto K, Kuroda T, Shimada K: **Hypercoagulable state in patients**  
44 **with Takayasu's arteritis.** *Thromb Haemost* 1996, **75**(5):712-716.
- 45 18. Keser G, Direskeneli H, Aksu K: **Management of Takayasu arteritis: a systematic review.**  
46 *Rheumatology (Oxford)* 2014, **53**(5):793-801.
- 47 19. de Souza AW, Machado NP, Pereira VM, Arraes AE, Reis Neto ET, Mariz HA, Sato EI:  
48 **Antiplatelet therapy for the prevention of arterial ischemic events in takayasu arteritis.** *Circ*  
49 *J* 2010, **74**(6):1236-1241.
- 50 20. Peredo R, Vila S, Goni M, Colon E, Rios-Sola G: **Reactive thrombocytosis: an early**  
51 **manifestation of Takayasu arteritis.** *J Clin Rheumatol* 2005, **11**(5):270-273.
- 52 21. Kaplan MJ: **Role of neutrophils in systemic autoimmune diseases.** *Arthritis Res Ther* 2013,  
53 **15**(5):219.
- 54 22. Surmiak M, Hubalewska-Mazgaj M, Wawrzycka-Adamczyk K, Szczeklik W, Musial J, Brzozowski  
55 **T, Sanak M: Neutrophil-related and serum biomarkers in granulomatosis with polyangiitis**  
56 **support extracellular traps mechanism of the disease.** *Clin Exp Rheumatol* 2016, **34**(3 Suppl  
57 97):98-104.
- 58 23. Kolls JK, Linden A: **Interleukin-17 family members and inflammation.** *Immunity* 2004,  
59 **21**(4):467-476.
- 60

- 1  
2  
3 24. Arnaud L, Haroche J, Mathian A, Gorochov G, Amoura Z: **Pathogenesis of Takayasu's arteritis: a 2011 update.** *Autoimmun Rev* 2011, **11**(1):61-67.  
4  
5 25. Verri WA, Jr., Souto FO, Vieira SM, Almeida SC, Fukada SY, Xu D, Alves-Filho JC, Cunha TM, Guerrero AT, Mattos-Guimaraes RB *et al*: **IL-33 induces neutrophil migration in rheumatoid arthritis and is a target of anti-TNF therapy.** *Ann Rheum Dis* 2010, **69**(9):1697-1703.  
6  
7  
8  
9  
10  
11  
12  
13  
14  
15  
16  
17  
18  
19  
20  
21  
22  
23  
24  
25  
26  
27  
28  
29  
30  
31  
32  
33  
34  
35  
36  
37  
38  
39  
40  
41  
42  
43  
44  
45  
46  
47  
48  
49  
50  
51  
52  
53  
54  
55  
56  
57  
58  
59  
60

For peer review only

**Table1. Laboratory parameters of TAK patients and health controls**

| <b>Parameter</b>         | <b>Control<br/>(n=78)</b> | <b>TAK<br/>(n=88)</b> | <b>P-value</b> |
|--------------------------|---------------------------|-----------------------|----------------|
| Age (year)               | 36.46±7.23                | 39.35±15.03           | 0.235          |
| Gender (female/male)     | 68/10                     | 78/10                 | 0.774          |
| WBC (10 <sup>9</sup> /L) | 5.53±1.60                 | 7.43±2.88             | 0.000          |
| LY (10 <sup>9</sup> /L)  | 1.72±0.46                 | 1.81±0.73             | 0.342          |
| NE (10 <sup>9</sup> /L)  | 3.37±1.29                 | 4.97±2.44             | 0.000          |
| PLT (10 <sup>9</sup> /L) | 247.21±45.49              | 241.82±79.69          | 0.387          |
| MPV( fL)                 | 10.21±0.98                | 10.37±0.97            | 0.269          |
| PDW %                    | 12.43±1.73                | 11.98±1.95            | 0.052          |
| ALT (U/L)                | 15.40±8.94                | 17.00±12.48           | 0.152          |
| BUN (mmol/L)             | 5.31±2.01                 | 5.52±3.29             | 0.177          |
| Cr (μmol/L)              | 63.87±10.47               | 75.57±14.37           | 0.422          |
| ESR (mm/1hr)             | 4.39(2.00-12.00)          | 19.62(1.00-92.00)     | 0.000          |
| hs-CRP(mg/L)             | 0.63(0.08-2.30)           | 9.50(0.08-38.62)      | 0.000          |
| NLR                      | 2.01±0.89                 | 3.86±3.28             | 0.001          |
| PLR                      | 149.58±39.65              | 167.44±76.58          | 0.023          |

Abbreviations: n, number of patients; WBC, white blood cell; LY, lymphocyte; NE, neutrophil; PLT, platelet ;MPV, mean platelet volume; PDW, Platelet distribution width; ALT, alanine aminotransferase; BUN, urea nitrogen; Cr, creatinine; ESR, erythrocyte sedimentation rate; hs-CRP, high-sensitivity C-reactive protein; NRL, neutrophil -to-lymphocyte ratio; PLR, platelet-to-lymphocyte ratio.

**Table 2. Comparison of the parameters in active and inactive TAK patients**

| Parameter                | inactive TAK<br>(n=45) | Active TAK<br>(n=43) | P-value |
|--------------------------|------------------------|----------------------|---------|
| Age (year)               | 39.54±14.75            | 37.90±15.68          | 0.227   |
| Gender (female/male)     | 41/4                   | 37/6                 | 0.454   |
| Disease duration (month) | 15.59±6.86             | 13.94±7.43           | 0.853   |
| WBC(10 <sup>9</sup> /L)  | 6.61±2.04              | 8.74±3.65            | 0.001   |
| LY(10 <sup>9</sup> /L)   | 1.77±0.62              | 1.87±0.81            | 0.526   |
| NE (10 <sup>9</sup> /L)  | 4.33±1.81              | 5.86±2.34            | 0.001   |
| PLT(10 <sup>9</sup> /L)  | 224.16±64.14           | 266.34±91.68         | 0.004   |
| ALT (U/L)                | 19.49±16.06            | 17.62±9.46           | 0.622   |
| BUN(mmol/L)              | 5.69±3.96              | 5.26±2.21            | 0.498   |
| Cr(μmol/L)               | 71.10±21.12            | 81.60±14.75          | 0.563   |
| IgA (g/L)                | 1.82±0.95              | 2.57±1.30            | 0.007   |
| IgG (g/L)                | 9.50±2.27              | 11.58±4.57           | 0.011   |
| IgM (g/L)                | 1.33±0.76              | 1.38±0.85            | 0.812   |
| C3 (g/L)                 | 0.97±0.15              | 1.21±0.20            | 0.000   |
| C4 (g/L)                 | 0.59±0.29              | 0.71±0.32            | 0.079   |
| ESR (mm/1hr)             | 8.39(1.00-19.00)       | 33.81(4.00-92.00)    | 0.000   |
| hs-CRP(mg/L)             | 1.85(0.08-32.83)       | 20.04(0.49-38.62)    | 0.000   |

Abbreviations: n, number of patients; WBC, white blood cell; LY, lymphocyte; NE, neutrophil; PLT, platelet; ALT, alanine aminotransferase; BUN, urea nitrogen; Cr, creatinine; IgA, immunoglobulin A; IgG, immunoglobulin G; IgM, immunoglobulin M; C3, complement 3; C4, complement 4; ESR, erythrocyte sedimentation rate; hs-CRP, high-sensitivity C-reactive protein.

Table 3. Correlations of laboratory findings with disease activity in TAK Patients

|     | Kerr's Score |                | hs-CRP   |                | ESR      |                |
|-----|--------------|----------------|----------|----------------|----------|----------------|
|     | <i>r</i>     | <i>p-value</i> | <i>r</i> | <i>p-value</i> | <i>r</i> | <i>p-value</i> |
| WBC | 0.336        | 0.000          | 0.458    | 0.000          | 0.388    | 0.000          |
| LY  | 0.054        | 0.602          | 0.119    | 0.205          | 0.276    | 0.023          |
| NE  | 0.311        | 0.001          | 0.466    | 0.000          | 0.327    | 0.356          |
| PLT | 0.353        | 0.000          | 0.345    | 0.000          | 0.490    | 0.000          |
| PLR | 0.185        | 0.052          | 0.239    | 0.010          | 0.270    | 0.010          |
| NLR | 0.284        | 0.002          | 0.313    | 0.006          | 0.249    | 0.019          |

Abbreviations: ESR, erythrocyte sedimentation rate; hs-CRP, high-sensitivity C - reactive protein; WBC, white blood cell; LY, lymphocyte; NE, neutrophil; PLT, platelet ; PLR, platelet-to-lymphocyte ratio; NRL, neutrophil -to-lymphocyte ratio;

## Figure legends

### Table 1. Laboratory parameters of TAK patients and health controls

Abbreviations: n, number of patients; WBC, white blood cell; LY, lymphocyte; NE, neutrophil; PLT, platelet ; MPV, mean platelet volume; PDW, platelet distribution width; ALT, alanine aminotransferase; BUN, brain urea nitrogen; Cr, creatinine; ESR, erythrocyte sedimentation rate; hs-CRP, high-sensitivity C-reactive protein; NRL, neutrophil -to-lymphocyte ratio; PLR, platelet-to-lymphocyte ratio.

### Table 2. Comparison of the parameters in active and inactive TAK patients

Abbreviations: n, number of patients; WBC, white blood cell; LY, lymphocyte; NE, neutrophil; PLT, platelet; ALT, alanine aminotransferase; BUN, brain urea nitrogen; Cr, creatinine; IgA, immunoglobulin A; IgG, immunoglobulin G; IgM, immunoglobulin M; C3, complement 3; C4, complement 4; ESR, erythrocyte sedimentation rate; hs-CRP, high-sensitivity C-reactive protein.

### Table 3. Correlations of laboratory findings with disease activity in TAK Patients

Abbreviations: WBC, white blood cell; LY, lymphocyte; NE, neutrophil; PLT, platelet ; PLR, platelet-to-lymphocyte ratio; NRL, neutrophil -to-lymphocyte ratio.

### Figure 1. Comparison of Platelet-to-Lymphocyte ratio (PLR) and Neutrophil -to-Lymphocyte ratio (NLR) between inactive and active TAK patients.

**Figure 2. Receiver-operating characteristic curves for the platelet-to-lymphocyte ratio (PLR) and neutrophil-to-lymphocyte Ratio (NLR) (Kerr Criteria as the standard).** For PLR, the area under the curve was 0.691, with 37.8% sensitivity and 93.0% specificity, for NLR, the area under the curve was 0.697, with sensitivity and specificity of 75.6% and 55.8%.

**Figure 3. Receiver-operating characteristic curves for the platelet-to-lymphocyte ratio (PLR) and neutrophil-to-lymphocyte Ratio (NLR) (CRP as the standard).** For PLR, the area under the curve was 0.775, with 64.7% sensitivity and 83.8% specificity, for NLR, the area under the curve was 0.698, with sensitivity and specificity of 52.9% and 81.1%.

**Figure 4. Receiver-operating characteristic curves for the platelet-to-lymphocyte ratio (PLR) and neutrophil-to-lymphocyte Ratio (NLR) (ESR as the standard).** For PLR, the area under the curve was 0.718, with 53.8% sensitivity and 83.3% specificity, for NLR, the area under the curve was 0.688, with sensitivity and specificity of 82.7% and 47.2%.

1  
2  
3  
4  
5  
6  
7  
8  
9  
10  
11  
12  
13  
14  
15  
16  
17  
18  
19  
20  
21  
22  
23  
24  
25  
26  
27  
28  
29  
30  
31  
32  
33  
34  
35  
36  
37  
38  
39  
40  
41  
42  
43  
44  
45  
46  
47  
48  
49  
50  
51  
52  
53  
54  
55  
56  
57  
58  
59  
60

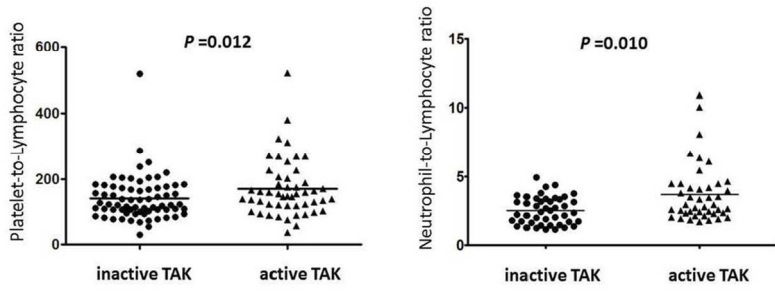

Figure 1. Comparison of Platelet-to-Lymphocyte ratio (PLR) and Neutrophil-to-Lymphocyte ratio (NLR) between inactive and active TAK patients.

105x74mm (300 x 300 DPI)

ew only

1  
2  
3  
4  
5  
6  
7  
8  
9  
10  
11  
12  
13  
14  
15  
16  
17  
18  
19  
20  
21  
22  
23  
24  
25  
26  
27  
28  
29  
30  
31  
32  
33  
34  
35  
36  
37  
38  
39  
40  
41  
42  
43  
44  
45  
46  
47  
48  
49  
50  
51  
52  
53  
54  
55  
56  
57  
58  
59  
60

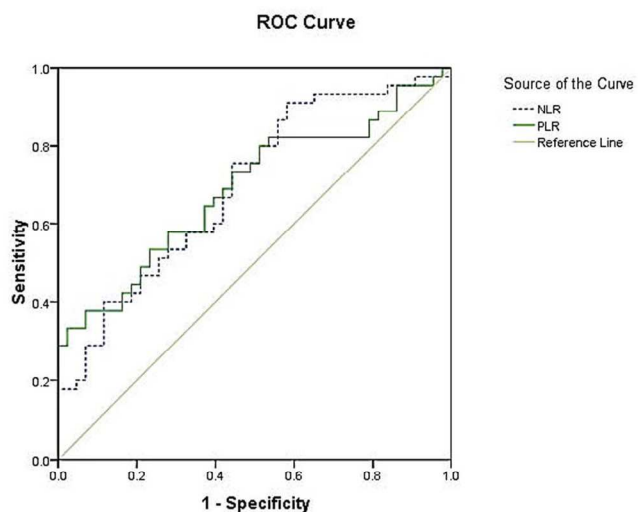

**Figure 2. Receiver-operating characteristic curves for the platelet-to-lymphocyte ratio (PLR) and neutrophil-to-lymphocyte Ratio (NLR). (Kerr: Criteria as the standard). For PLR, the area under the curve was 0.691, with 37.8% sensitivity and 93.0% specificity. for NLR, the area under the curve was 0.697, with sensitivity and specificity of 75.6% and 55.8%.**

110x155mm (300 x 300 DPI)



1  
2  
3  
4  
5  
6  
7  
8  
9  
10  
11  
12  
13  
14  
15  
16  
17  
18  
19  
20  
21  
22  
23  
24  
25  
26  
27  
28  
29  
30  
31  
32  
33  
34  
35  
36  
37  
38  
39  
40  
41  
42  
43  
44  
45  
46  
47  
48  
49  
50  
51  
52  
53  
54  
55  
56  
57  
58  
59  
60

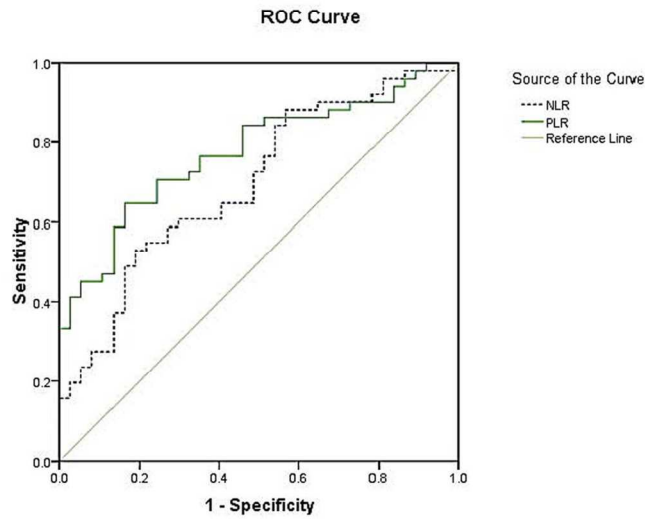

Figure 3. Receiver-operating characteristic curves for the platelet-to-lymphocyte ratio (PLR) and neutrophil-to-lymphocyte Ratio (NLR). (CRP as the standard). For PLR, the area under the curve was 0.775, with 64.7% sensitivity and 83.8% specificity, for NLR, the area under the curve was 0.698, with sensitivity and specificity of 52.9% and 81.1%.

108x154mm (300 x 300 DPI)

1  
2  
3  
4  
5  
6  
7  
8  
9  
10  
11  
12  
13  
14  
15  
16  
17  
18  
19  
20  
21  
22  
23  
24  
25  
26  
27  
28  
29  
30  
31  
32  
33  
34  
35  
36  
37  
38  
39  
40  
41  
42  
43  
44  
45  
46  
47  
48  
49  
50  
51  
52  
53  
54  
55  
56  
57  
58  
59  
60

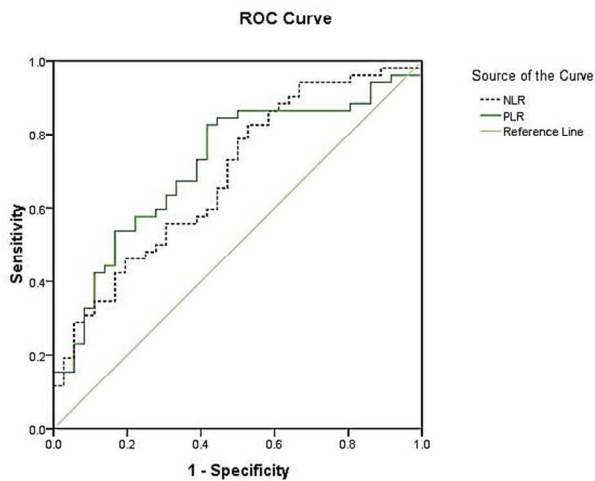

Figure 4. Receiver-operating characteristic curves for the platelet-to-lymphocyte ratio (PLR) and neutrophil-to-lymphocyte Ratio (NLR). (ESR as the standard). For PLR, the area under the curve was 0.718, with 53.8% sensitivity and 83.3% specificity, for NLR, the area under the curve was 0.688, with sensitivity and specificity of 82.7% and 47.2%.

117x166mm (300 x 300 DPI)

| Section & Topic          | No  | Item                                                                                                                                                   | Reported on page # |
|--------------------------|-----|--------------------------------------------------------------------------------------------------------------------------------------------------------|--------------------|
| <b>TITLE OR ABSTRACT</b> |     | Platelet-to-Lymphocyte Ratio and Neutrophil-to-Lymphocyte Ratio were Associated to Disease Activity in Patients with Takayasu's Arteritis              |                    |
|                          | 1   | Identification as a study of diagnostic accuracy using at least one measure of accuracy (such as sensitivity, specificity, predictive values, or AUC)  | 1                  |
| <b>ABSTRACT</b>          |     |                                                                                                                                                        |                    |
|                          | 2   | Structured summary of study design, methods, results, and conclusions (for specific guidance, see STARD for Abstracts)                                 | 1                  |
| <b>INTRODUCTION</b>      |     |                                                                                                                                                        |                    |
|                          | 3   | Scientific and clinical background, including the intended use and clinical role of the index test                                                     | 2                  |
|                          | 4   | Study objectives and hypotheses                                                                                                                        | 3                  |
| <b>METHODS</b>           |     |                                                                                                                                                        |                    |
| <i>Study design</i>      | 5   | Whether data collection was planned before the index test and reference standard were performed (prospective study) or after (retrospective study)     | 3                  |
| <i>Participants</i>      | 6   | Eligibility criteria                                                                                                                                   | 3                  |
|                          | 7   | On what basis potentially eligible participants were identified (such as symptoms, results from previous tests, inclusion in registry)                 | 3                  |
|                          | 8   | Where and when potentially eligible participants were identified (setting, location and dates)                                                         | 3                  |
|                          | 9   | Whether participants formed a consecutive, random or convenience series                                                                                |                    |
| <i>Test methods</i>      | 10a | Index test, in sufficient detail to allow replication                                                                                                  | 4                  |
|                          | 10b | Reference standard, in sufficient detail to allow replication                                                                                          | 4                  |
|                          | 11  | Rationale for choosing the reference standard (if alternatives exist)                                                                                  | 4                  |
|                          | 12a | Definition of and rationale for test positivity cut-offs or result categories of the index test, distinguishing pre-specified from exploratory         | 4                  |
|                          | 12b | Definition of and rationale for test positivity cut-offs or result categories of the reference standard, distinguishing pre-specified from exploratory | 4                  |
|                          | 13a | Whether clinical information and reference standard results were available to the performers/readers of the index test                                 | 4                  |
|                          | 13b | Whether clinical information and index test results were available to the assessors of the reference standard                                          | 4                  |
| <i>Analysis</i>          | 14  | Methods for estimating or comparing measures of diagnostic accuracy                                                                                    | 4                  |
|                          | 15  | How indeterminate index test or reference standard results were handled                                                                                | 4                  |
|                          | 16  | How missing data on the index test and reference standard were handled                                                                                 | 4                  |
|                          | 17  | Any analyses of variability in diagnostic accuracy, distinguishing pre-specified from exploratory                                                      | 4                  |
|                          | 18  | Intended sample size and how it was determined                                                                                                         | 4                  |
| <b>RESULTS</b>           |     |                                                                                                                                                        |                    |
| <i>Participants</i>      | 19  | Flow of participants, using a diagram                                                                                                                  |                    |
|                          | 20  | Baseline demographic and clinical characteristics of participants                                                                                      | 4                  |
|                          | 21a | Distribution of severity of disease in those with the target condition                                                                                 |                    |
|                          | 21b | Distribution of alternative diagnoses in those without the target condition                                                                            |                    |
|                          | 22  | Time interval and any clinical interventions between index test and reference standard                                                                 |                    |
| <i>Test results</i>      | 23  | Cross tabulation of the index test results (or their distribution) by the results of the reference standard                                            | 5                  |
|                          | 24  | Estimates of diagnostic accuracy and their precision (such as 95% confidence intervals)                                                                | 5                  |
|                          | 25  | Any adverse events from performing the index test or the reference standard                                                                            | 5                  |
| <b>DISCUSSION</b>        |     |                                                                                                                                                        |                    |
|                          | 26  | Study limitations, including sources of potential bias, statistical uncertainty, and generalisability                                                  | 7                  |
|                          | 27  | Implications for practice, including the intended use and clinical role of the index test                                                              |                    |
| <b>OTHER INFORMATION</b> |     |                                                                                                                                                        |                    |
|                          | 28  | Registration number and name of registry                                                                                                               |                    |
|                          | 29  | Where the full study protocol can be accessed                                                                                                          |                    |
|                          | 30  | Sources of funding and other support; role of funders                                                                                                  | 8                  |

# STARD 2015

---

## AIM

STARD stands for “Standards for Reporting Diagnostic accuracy studies”. This list of items was developed to contribute to the completeness and transparency of reporting of diagnostic accuracy studies. Authors can use the list to write informative study reports. Editors and peer-reviewers can use it to evaluate whether the information has been included in manuscripts submitted for publication.

---

## EXPLANATION

A **diagnostic accuracy study** evaluates the ability of one or more medical tests to correctly classify study participants as having a **target condition**. This can be a disease, a disease stage, response or benefit from therapy, or an event or condition in the future. A medical test can be an imaging procedure, a laboratory test, elements from history and physical examination, a combination of these, or any other method for collecting information about the current health status of a patient.

The test whose accuracy is evaluated is called **index test**. A study can evaluate the accuracy of one or more index tests. Evaluating the ability of a medical test to correctly classify patients is typically done by comparing the distribution of the index test results with those of the **reference standard**. The reference standard is the best available method for establishing the presence or absence of the target condition. An accuracy study can rely on one or more reference standards.

If test results are categorized as either positive or negative, the cross tabulation of the index test results against those of the reference standard can be used to estimate the **sensitivity** of the index test (the proportion of participants *with* the target condition who have a positive index test), and its **specificity** (the proportion *without* the target condition who have a negative index test). From this cross tabulation (sometimes referred to as the contingency or “2x2” table), several other accuracy statistics can be estimated, such as the positive and negative **predictive values** of the test. Confidence intervals around estimates of accuracy can then be calculated to quantify the statistical **precision** of the measurements.

If the index test results can take more than two values, categorization of test results as positive or negative requires a **test positivity cut-off**. When multiple such cut-offs can be defined, authors can report a receiver operating characteristic (ROC) curve which graphically represents the combination of sensitivity and specificity for each possible test positivity cut-off. The **area under the ROC curve** informs in a single numerical value about the overall diagnostic accuracy of the index test.

The **intended use** of a medical test can be diagnosis, screening, staging, monitoring, surveillance, prediction or prognosis. The **clinical role** of a test explains its position relative to existing tests in the clinical pathway. A replacement test, for example, replaces an existing test. A triage test is used before an existing test; an add-on test is used after an existing test.

Besides diagnostic accuracy, several other outcomes and statistics may be relevant in the evaluation of medical tests. Medical tests can also be used to classify patients for purposes other than diagnosis, such as staging or prognosis. The STARD list was not explicitly developed for these other outcomes, statistics, and study types, although most STARD items would still apply.

---

## DEVELOPMENT

This STARD list was released in 2015. The 30 items were identified by an international expert group of methodologists, researchers, and editors. The guiding principle in the development of STARD was to select items that, when reported, would help readers to judge the potential for bias in the study, to appraise the applicability of the study findings and the validity of conclusions and recommendations. The list represents an update of the first version, which was published in 2003.

More information can be found on <http://www.equator-network.org/reporting-guidelines/stard>.



Supplement: bmjopen-2016-014451.draft_revisions.pdf [file bmjopen-2016-014451.draft_revisions.pdf]
